# Supplementary material for: LC-MS/MS Isomeric Profiling of N-Glycans Derived from Low-Abundant Serum Glycoproteins in Mild Cognitive Impairment Patients
Source: MDPI journal article supplement (doi:10.3390/biom12111657), 2022-11-08
Supplement: s1 [file s1]

[Supplementary data]

**LC-MS/MS Isomeric Profiling of *N*-glycans Derived from Low Abundant  
Serum Glycoproteins in Mild Cognitive Impairment Patients**

Cristian D. Gutierrez Reyes<sup>1</sup>, Md Abdul Hakim<sup>1</sup>, Atashi Mojgan<sup>1</sup>, Mona Goli<sup>1</sup>, Sakshi Gautman<sup>1</sup>,  
Junyao Wang<sup>1</sup>, Andrew I. Bennett<sup>1</sup>, Jianhui Zhu<sup>2</sup>, David M. Lubman<sup>2</sup> and Yehia Mechref<sup>1\*</sup>

1. Department of Chemistry and Biochemistry, Texas Tech University, Lubbock, TX
2. Department of Surgery, The University of Michigan, Ann Arbor, MI 48109

\*Corresponding author

Department of Chemistry and Biochemistry

Texas Tech University

Lubbock, TX 79409-1061

Email: yehia.mechref@ttu.edu

Tel: 806-742-3059

Fax: 806-742-1289

## Table of Contents:

### Supplementary Figures:

**Supplementary Figure S1.** EICs of the isomeric *N*-glycans identified using the **A)** MGC-LC-MS system and the **B)** C18(50cm)-LC-MS system.

**Supplementary Figure S2.** Isomeric *N*-glycans observed with the **MGC** column. Glycan nomenclature: GlcNAc, Hex, Fuc, NeuAc (*N*-acetylglucosamine, Hexose, Fucose, *N*-acetylneuraminic acid).

**Supplementary Figure S3.** Isomeric *N*-glycans observed with the **C18(50cm)** column. Glycan nomenclature: GlcNAc, Hex, Fuc, NeuAc (*N*-acetylglucosamine, Hexose, Fucose, *N*-acetylneuraminic acid).

**Supplementary Figure S4.** Heat map for the MRM MGC-LC-MS approach.

**Supplementary Figure S5.** Ingenuity Pathway Analysis (IPA) of the identified glycoproteins. A) Activation of the TP53 gene, B) canonical pathway identification, and C) activation of the THOP1 gene.

**Supplementary Figure S6.** TIC and mass spectra of the *N*-glycan 5-6-0-3 Isomer 3.

**Supplementary Figure S7.** TIC and mass spectra of the *N*-glycan 6-7-0-4 Isomer 5.

**Supplementary Figure S8.** TIC and mass spectra of the *N*-glycan 4-5-1-1 Isomer 3.

**Supplementary Figure S9.** TIC and mass spectra of the *N*-glycan 5-6-1-2 Isomer 1.

**Supplementary Figure S10.** TIC and mass spectra of the *N*-glycan 6-7-1-3 Isomer 5.

### Supplementary Tables:

**Supplementary Table S1.** Clinical information.

**Supplementary Table S2.** MGC analysis, normalized abundance of all identified *N*-glycans digested from depleted low abundant serum glycoproteins of **control** patients. GlcNAc, Hex, Fuc, NeuAc (*N*-acetylglucosamine, Hexose, Fucose, *N*-acetylneuraminic acid), and Iso = isomer.

**Supplementary Table S3.** MGC analysis, normalized abundance of all identified *N*-glycans digested from depleted low abundant serum glycoproteins of **MCI** patients. GlcNAc, Hex, Fuc, NeuAc (*N*-acetylglucosamine, Hexose, Fucose, *N*-acetylneuraminic acid), and Iso = isomer.

**Supplementary Table S4.** C18(50cm) analysis, normalized abundance of all identified *N*-glycans digested from depleted low abundant serum glycoproteins of **control** patients. GlcNAc, Hex, Fuc, NeuAc (*N*-acetylglucosamine, Hexose, Fucose, *N*-acetylneuraminic acid), and Iso = isomer.

**Supplementary Table S5.** C18(50cm) analysis, normalized abundance of all identified *N*-glycans digested from depleted low abundant serum glycoproteins of **MCI** patients. GlcNAc, Hex, Fuc, NeuAc (*N*-acetylglucosamine, Hexose, Fucose, *N*-acetylneuraminic acid), and Iso = isomer.

**Supplementary Table S6.** MRM target list. GlcNAc, Hex, Fuc, NeuAc (*N*-acetylglucosamine, Hexose, Fucose, *N*-acetylneuraminic acid), and Iso = isomer.

**Supplementary Table S7.** MGC **MRM** analysis, normalized abundance of targeted *N*-glycans digested from depleted low abundant serum glycoproteins of **control** patients. GlcNAc, Hex, Fuc, NeuAc (*N*-acetylglucosamine, Hexose, Fucose, *N*-acetylneuraminic acid), and Iso = isomer.

**Supplementary Table S8.** MGC **MRM** analysis, normalized abundance of targeted *N*-glycans digested from depleted low abundant serum glycoproteins of **MCI** patients. GlcNAc, Hex, Fuc, NeuAc (*N*-acetylglucosamine, Hexose, Fucose, *N*-acetylneuraminic acid), and Iso = isomer.

**Supplementary Table S9.** List of glycoproteins observed in the proteomic analysis of the low abundant serum glycoproteins from depleted serum samples of control and MCI patients.

## Supplementary Figure S1

**Supplementary Figure S1.** EICs of the isomeric *N*-glycans identified using the **A)** MGC-LC-MS system and the **B)** C18(50cm)-LC-MS system.

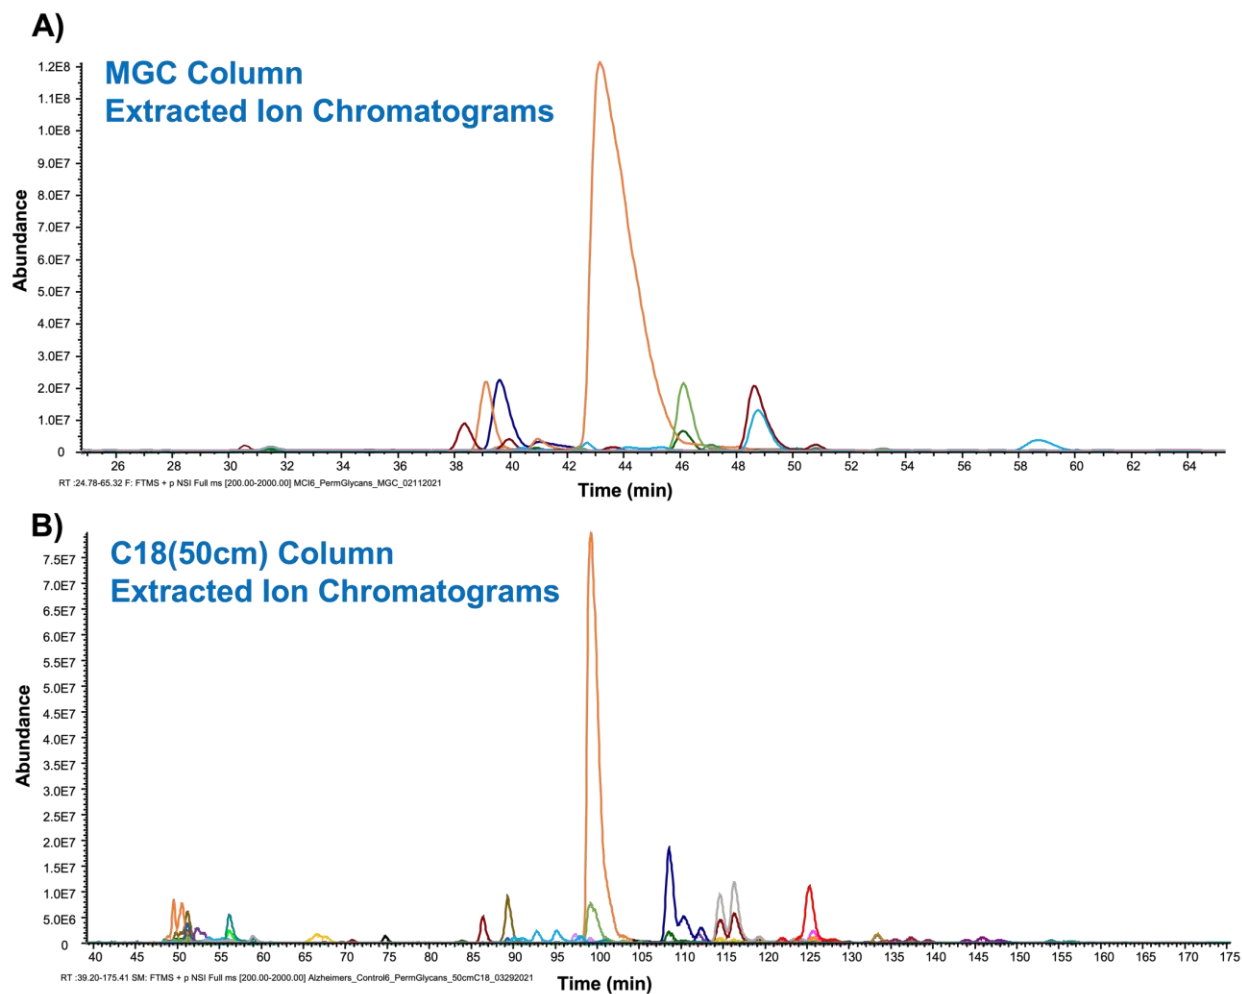

## Supplementary Figure S2

**Supplementary Figure S2.** Isomeric *N*-glycans observed with the MGC column. Glycan nomenclature: GlcNAc, Hex, Fuc, NeuAc (*N*-acetylglucosamine, Hexose, Fucose, *N*-acetylneuraminic acid).

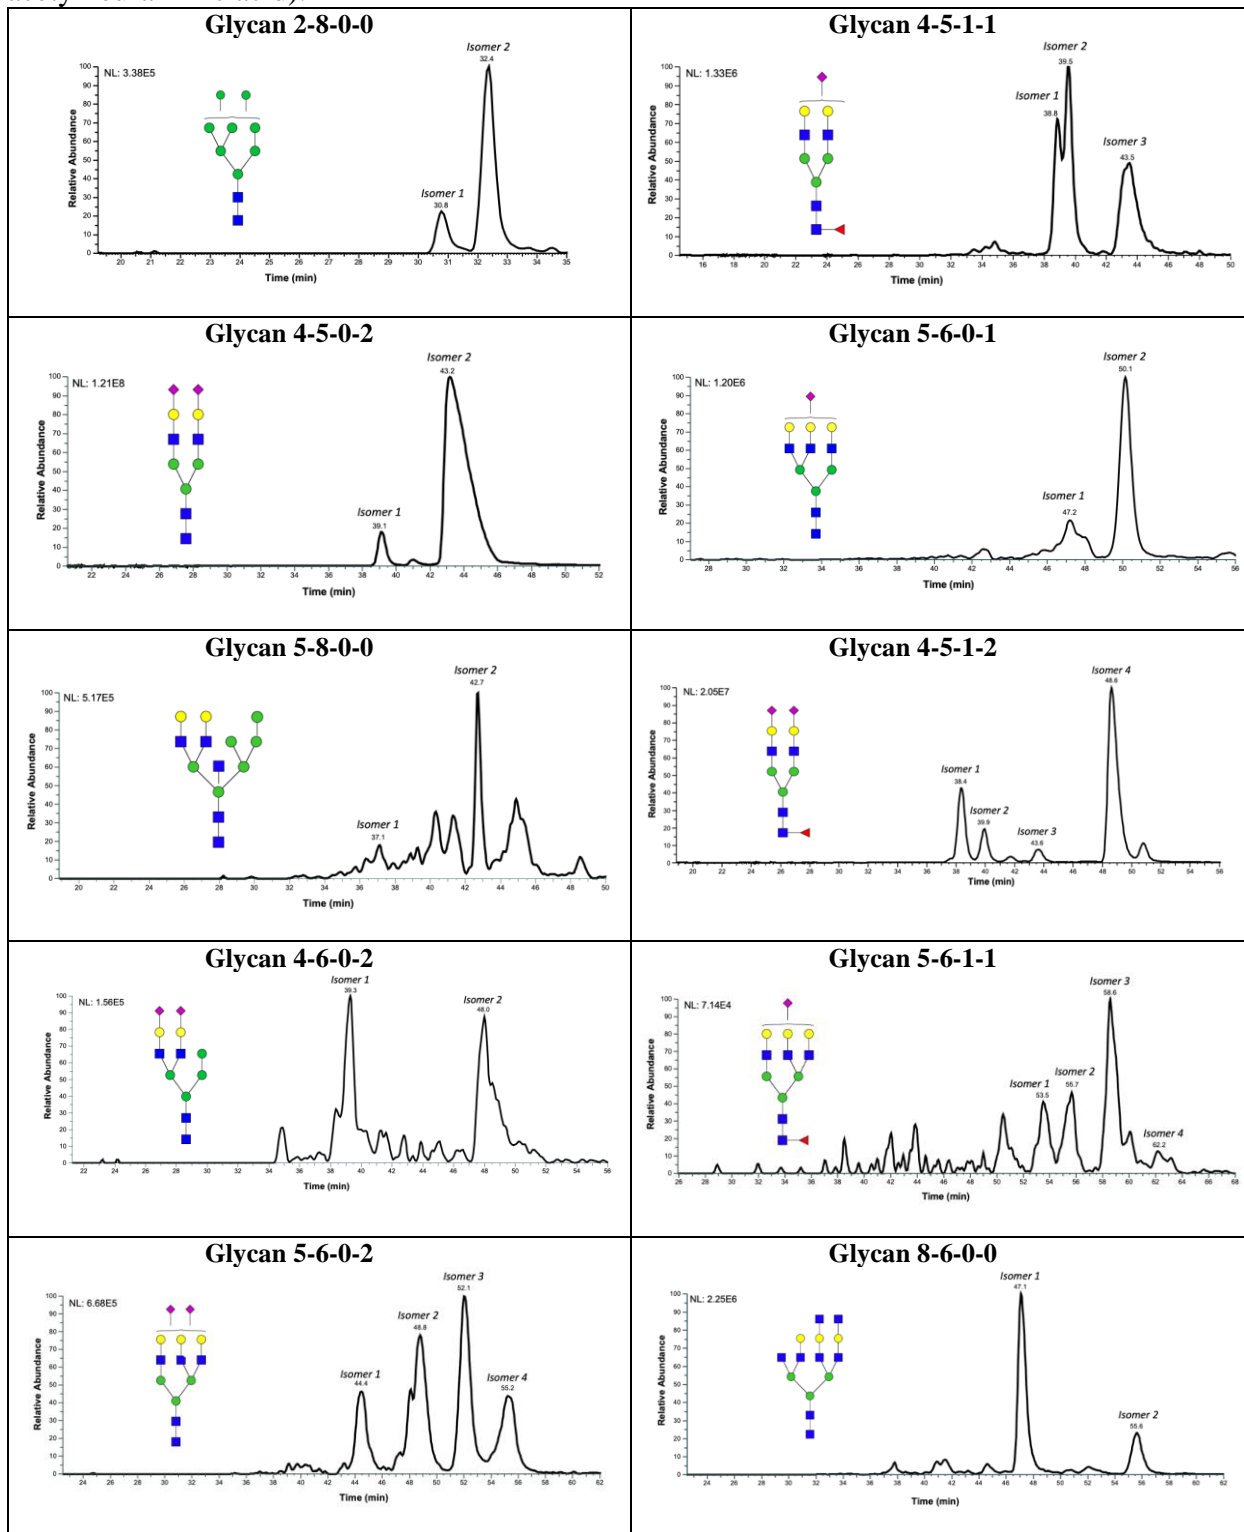

Supplementary Figure S2. Continued...

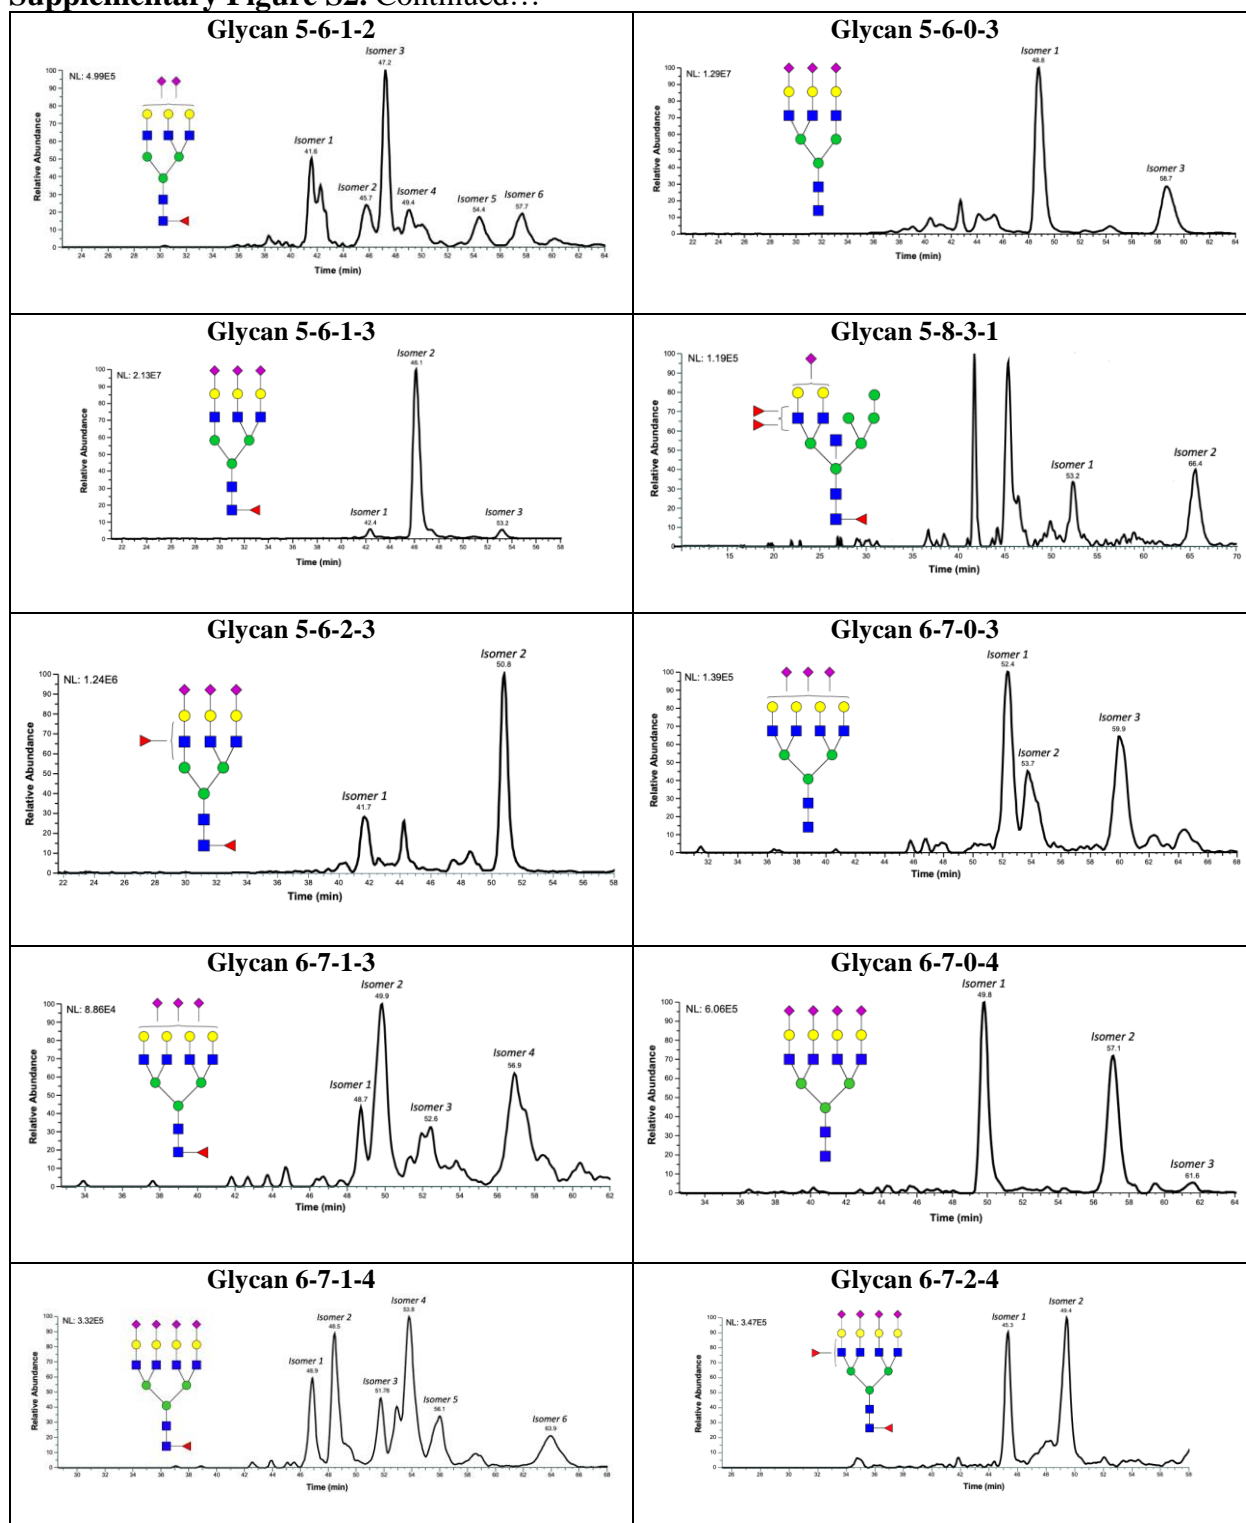

## Supplementary Figure S3

**Supplementary Figure S3.** Isomeric *N*-glycans observed with the **C18(50cm)** column. Glycan nomenclature: GlcNAc, Hex, Fuc, NeuAc (*N*-acetylglucosamine, Hexose, Fucose, *N*-acetylneuraminic acid).

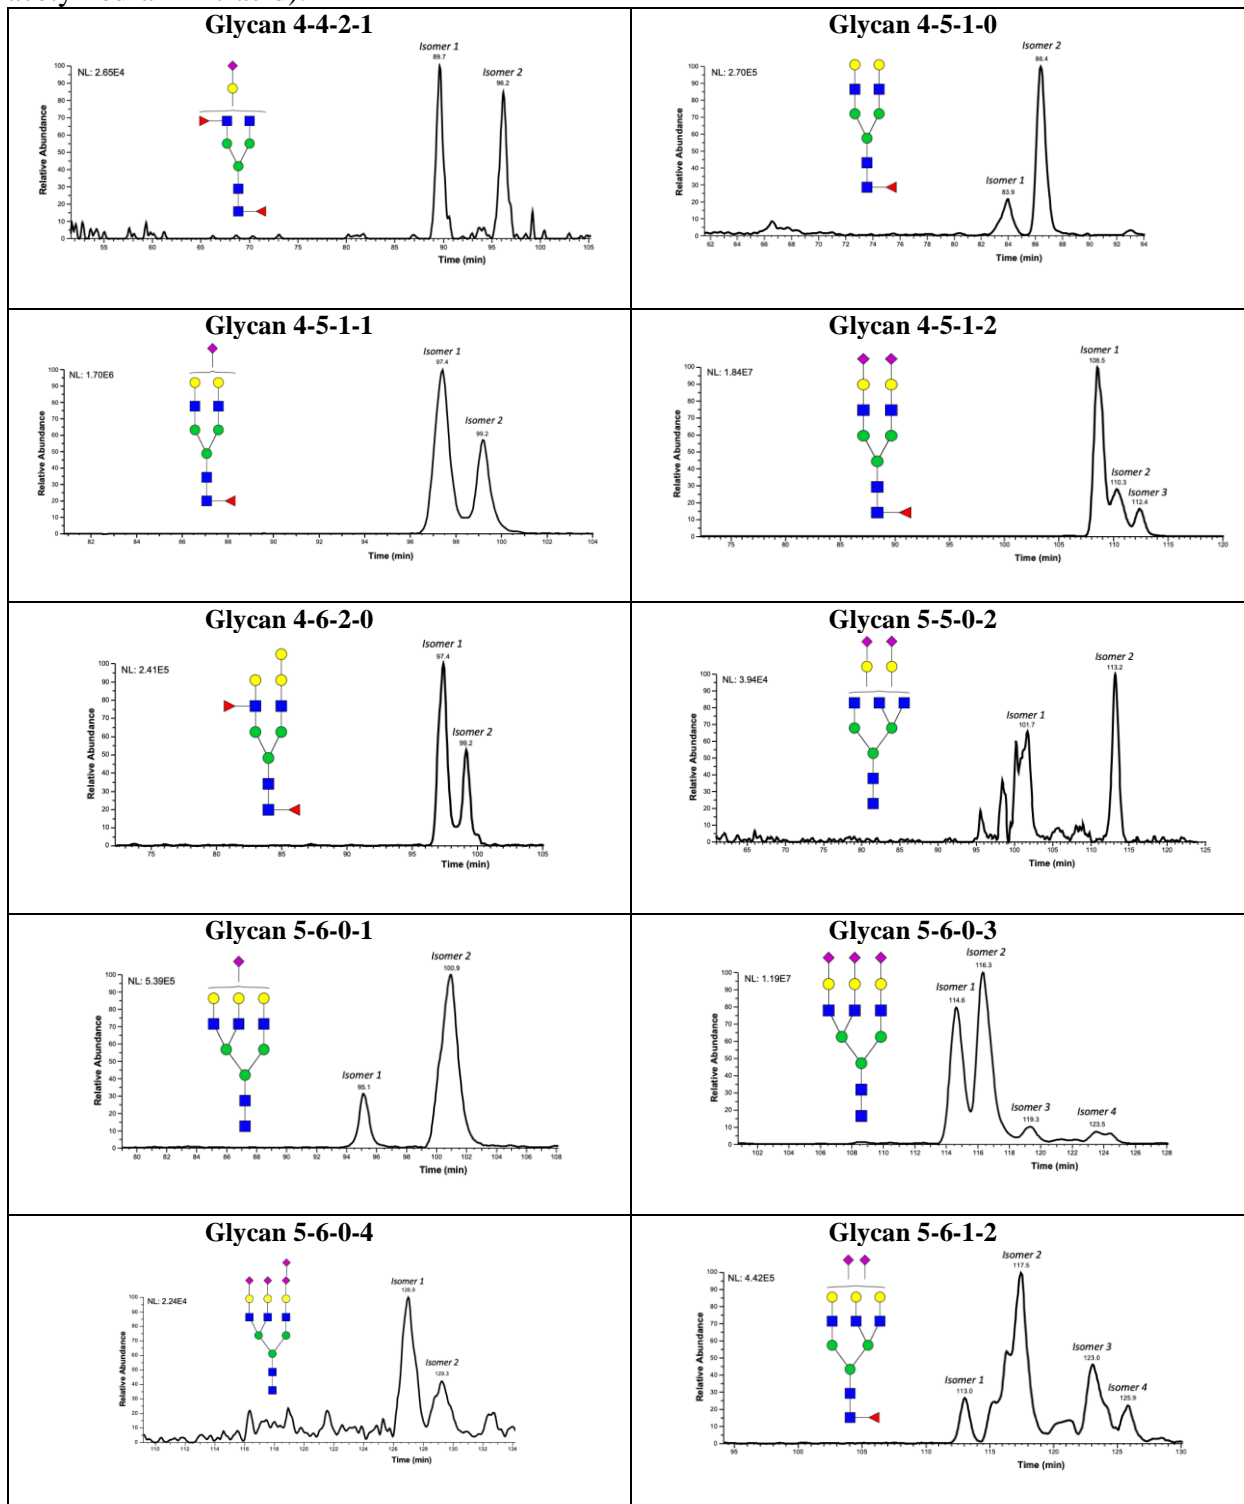

Supplementary Figure S3. Continued...

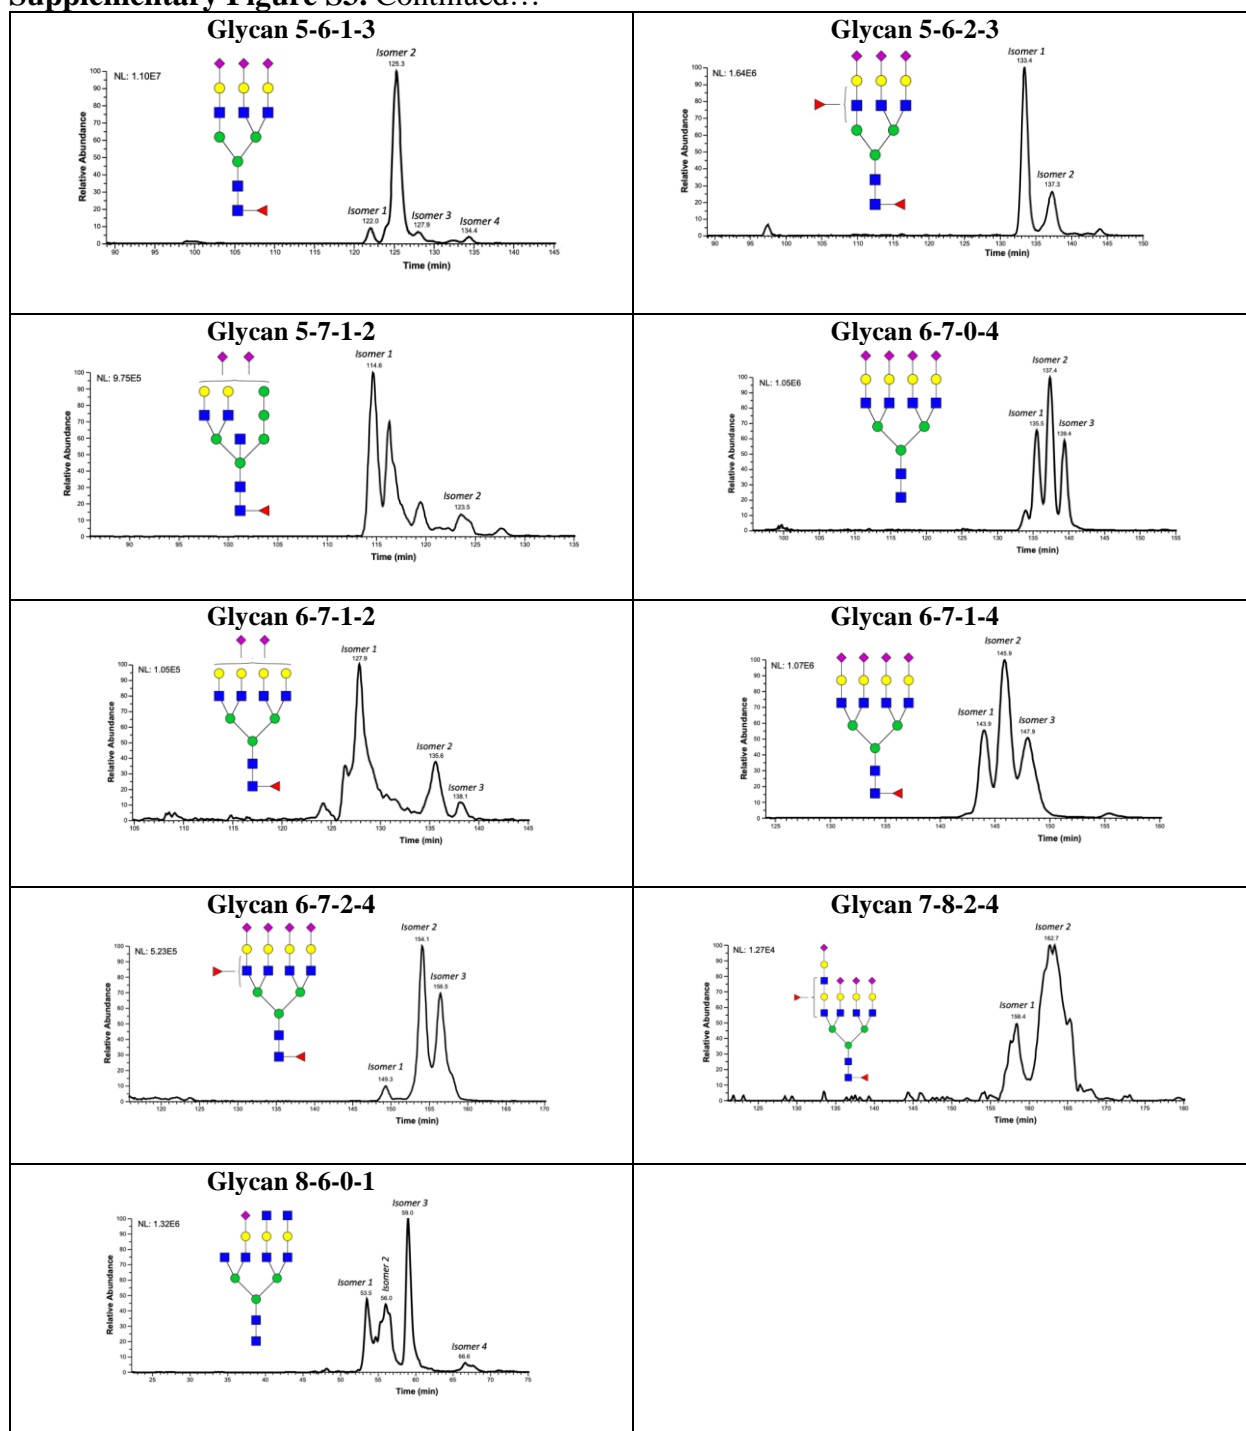



## Supplementary Figure S4

**Supplementary Figure S4.** Heat map for the MRM MGC-LC-MS approach.

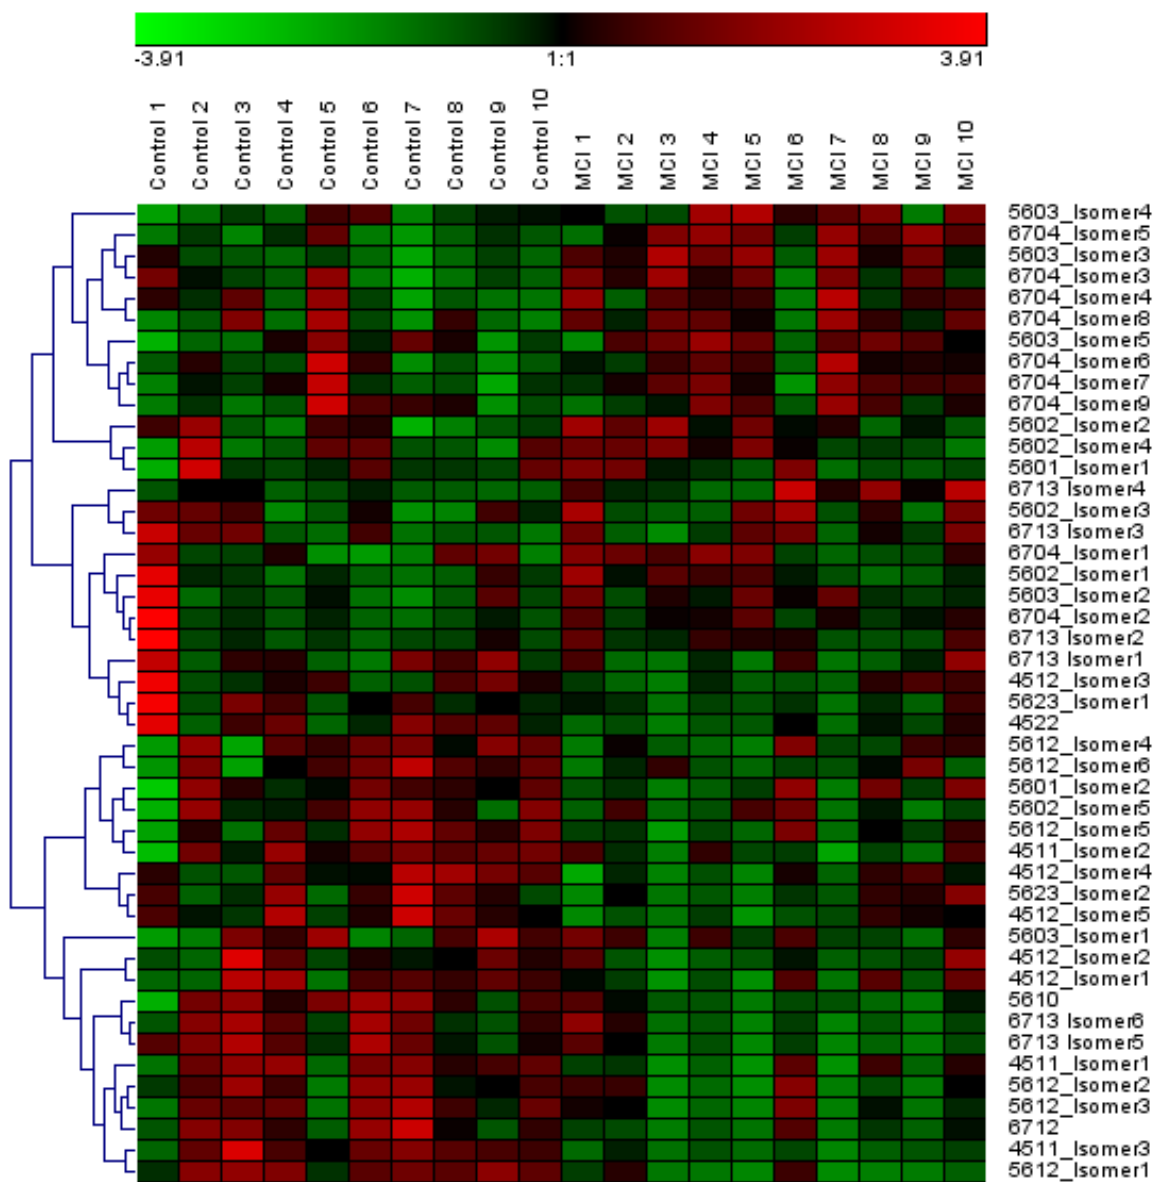

Supplementary Figure S5

**Supplementary Figure S5.** Ingenuity Pathway Analysis (IPA) of the identified glycoproteins. A) Activation of the TP53 gene, B) canonical pathway identification, and C) activation of the THOP1 gene.

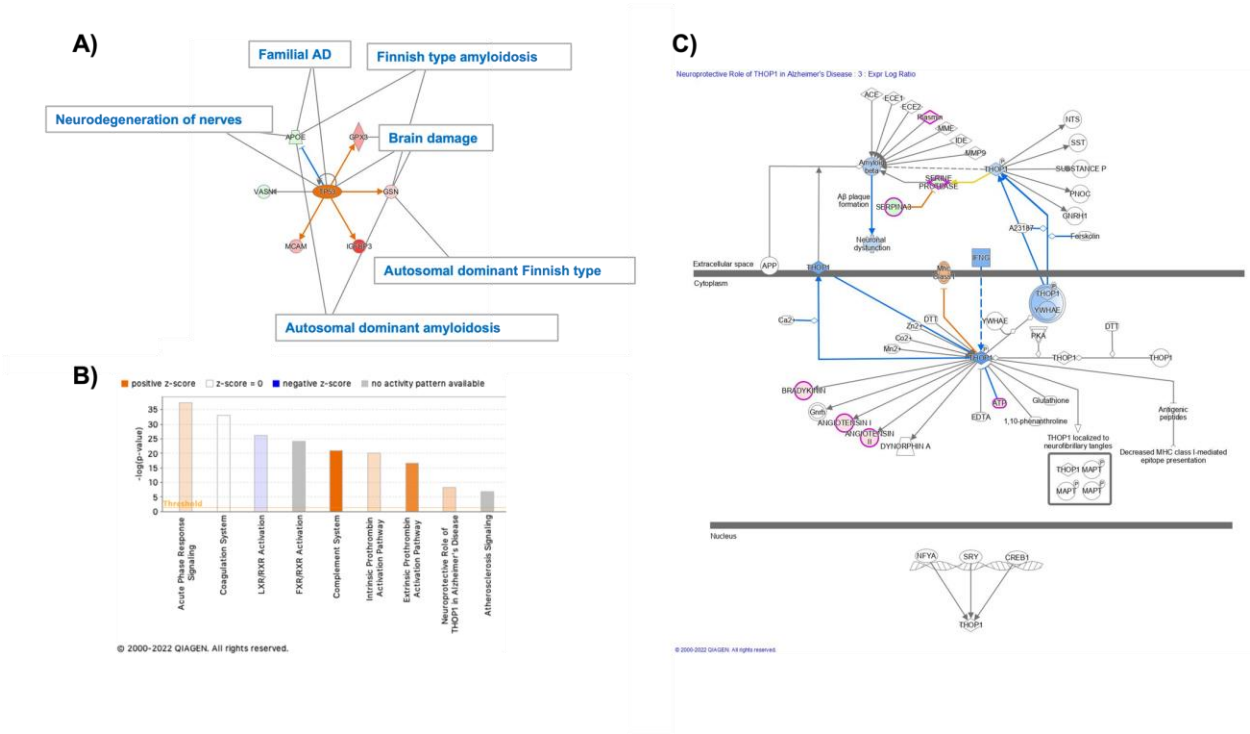

## Supplementary Figure S6

Supplementary Figure S6. TIC and mass spectra of the *N*-glycan 5-6-0-3 Isomer 3.

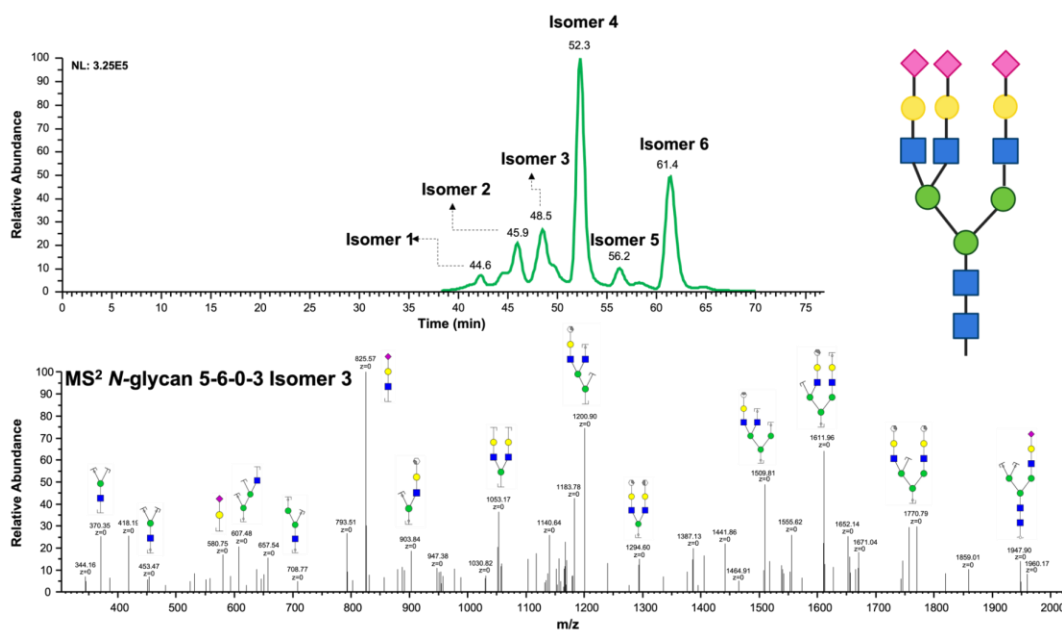

## Supplementary Figure S7

Supplementary Figure S7. TIC and mass spectra of the *N*-glycan 6-7-0-4 Isomer 5.

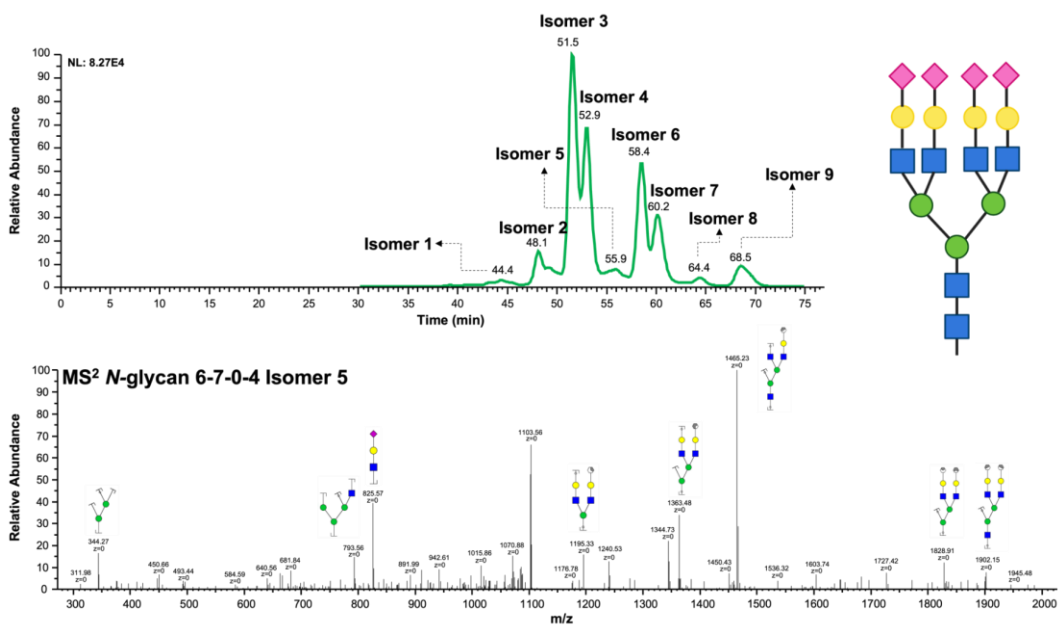

Supplementary Figure S8

Supplementary Figure S8. TIC and mass spectra of the *N*-glycan 4-5-1-1 Isomer 3.

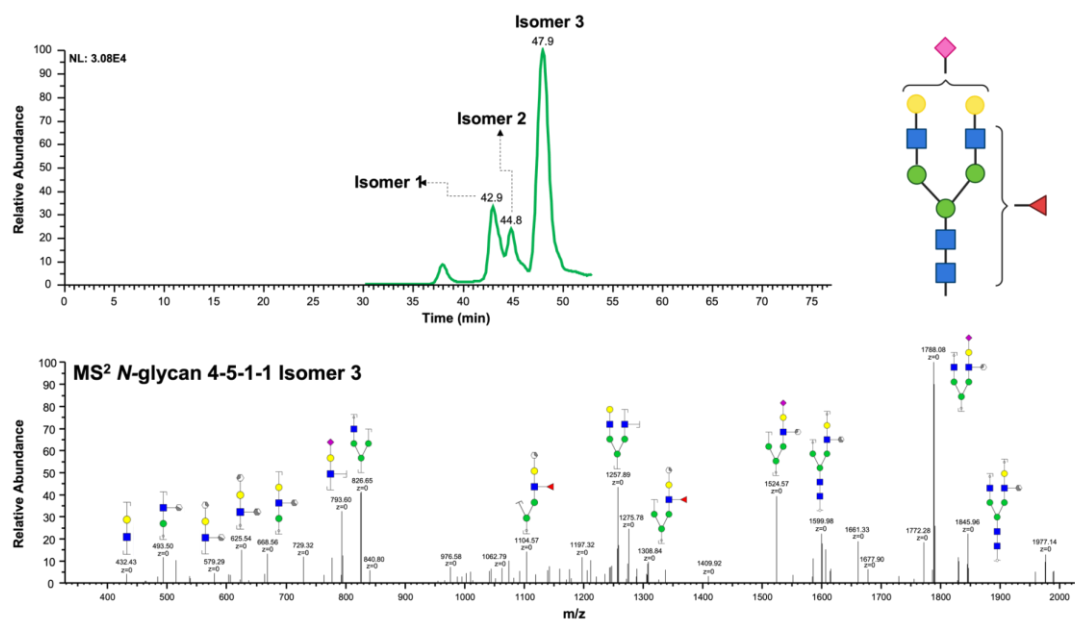

Supplementary Figure S9

Supplementary Figure S9. TIC and mass spectra of the *N*-glycan 5-6-1-2 Isomer 1.

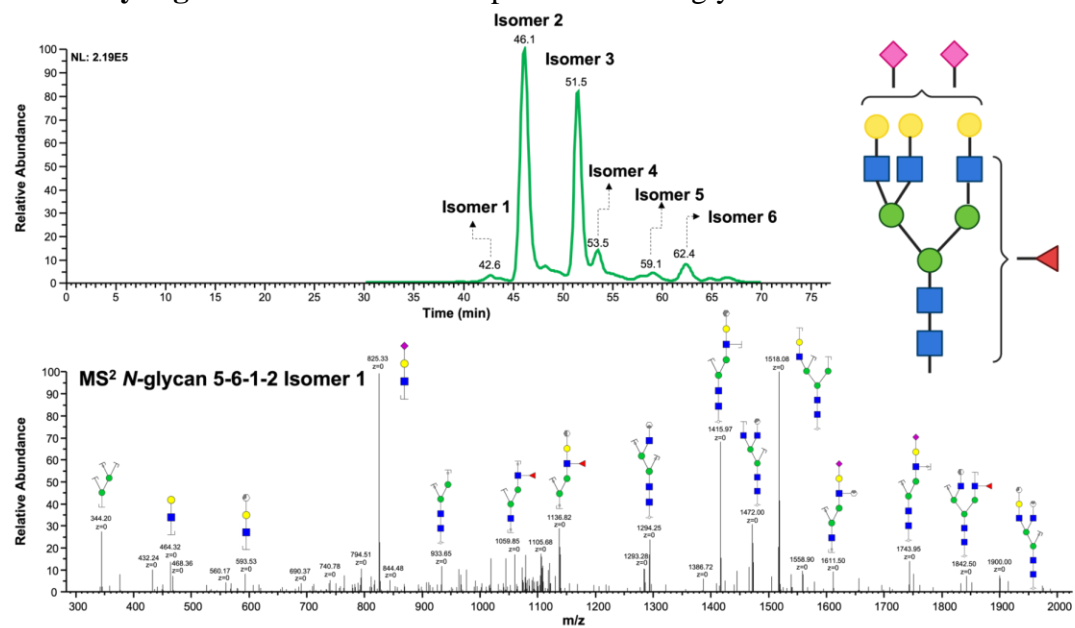

**Supplementary Figure S10.** TIC and mass spectra of the *N*-glycan 6-7-1-3 Isomer 5.

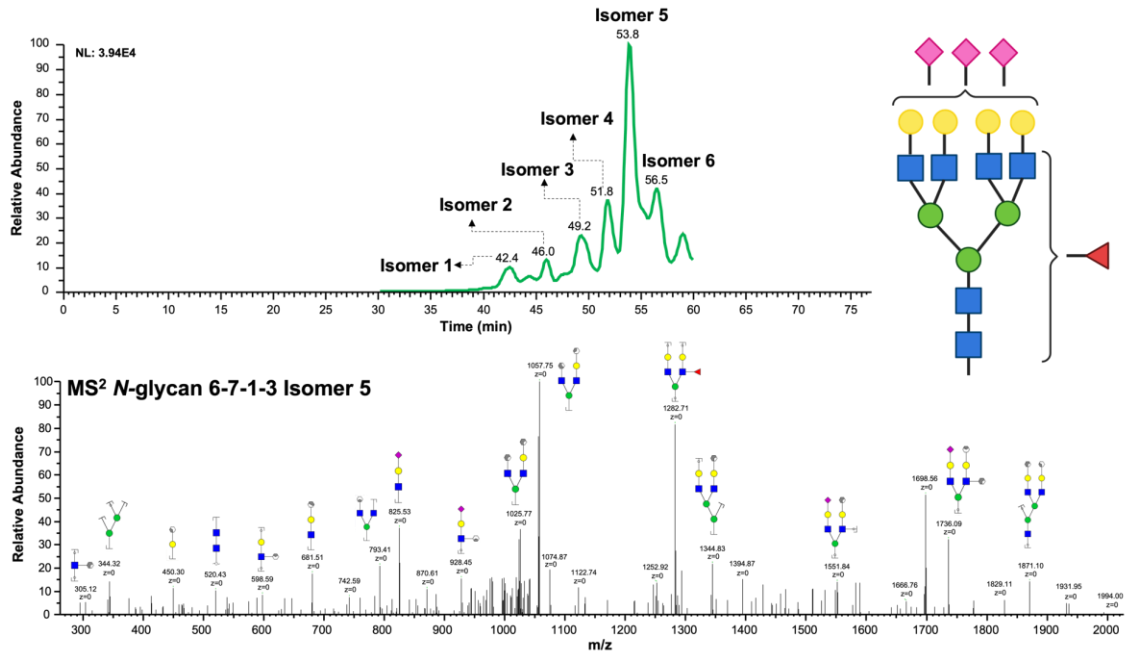

**Supplementary Table S1.** Clinical information.

| Sample / Diagnosis | Age | Sex    | Other observations                                     |
|--------------------|-----|--------|--------------------------------------------------------|
| Control 1          | 75  | Male   | Former smoker                                          |
| Control 2          | 64  | Female | Non-smoker (less than 100 times in life)               |
| Control 3          | 69  | Male   | Smokes a pipe                                          |
| Control 4          | 85  | Male   | Former smoker, quit more than 30 days ago              |
| Control 5          | 65  | Male   | Non-smoker (less than 100 times in life)               |
| Control 6          | 87  | Male   | Non-smoker (less than 100 times in life)               |
| Control 7          | 67  | Male   | Non-smoker (less than 100 times in life)               |
| Control 8          | 58  | Male   | Non-smoker (less than 100 times in life)               |
| Control 9          | 82  | Female | Non-smoker (less than 100 times in life)               |
| Control 10         | 80  | Male   | Non-smoker (less than 100 times in life)               |
| MCI 1              | 61  | Male   | Former smoker, quit more than 30 days ago and Diabetes |
| MCI 2              | 78  | Female | Former smoker, quit more than 30 days ago.             |
| MCI 3              | 65  | Female | Non-smoker (less than 100 times in life)               |
| MCI 4              | 67  | Male   | Non-smoker (less than 100 times in life) and Diabetes  |
| MCI 5              | 77  | Male   | Non-smoker                                             |
| MCI 6              | 69  | Male   | Non-smoker (less than 100 times in life)               |
| MCI 7              | 84  | Male   | Non-smoker (less than 100 times in life)               |
| MCI 8              | 86  | Male   | Non-smoker (less than 100 times in life) and Diabetes  |
| MCI 9              | 78  | Male   | Former smoker, quit more than 1 year ago               |
| MCI 10             | 77  | Female | Former smoker, quit more than 30 days ago              |

**Supplementary Table S2.** MGC analysis, normalized abundance of all identified *N*-glycans digested from depleted low abundant serum glycoproteins of **control** patients. GlcNAc, Hex, Fuc, NeuAc (*N*-acetylglucosamine, Hexose, Fucose, *N*-acetylneuraminic acid), and Iso = isomer.

| Glycan        | Control 1 | Control 2 | Control 3 | Control 4 | Control 5 | Control 6 | Control 7 | Control 8 | Control 9 | Control 10 |
|---------------|-----------|-----------|-----------|-----------|-----------|-----------|-----------|-----------|-----------|------------|
| 2-5-0-0       | 0.3425    | 0.3044    | 0.5798    | 0.4057    | 0.3820    | 0.3380    | 0.2942    | 0.2488    | 0.3247    | 0.5128     |
| 2-6-0-0       | 0.7509    | 1.3072    | 0.4924    | 0.9121    | 0.7294    | 1.0723    | 0.7075    | 0.7359    | 0.8162    | 1.1109     |
| 3-5-0-0       | 0.0110    | 0.0089    | 0.1023    | 0.0086    | 0.0064    | 0.0038    | 0.0342    | 0.0081    | 0.0089    | 0.0114     |
| 2-7-0-0       | 0.0948    | 0.2282    | 0.0763    | 0.0990    | 0.0917    | 0.0856    | 0.1428    | 0.1139    | 0.0931    | 0.1123     |
| 3-6-0-0       | 0.0174    | 0.0153    | 0.0503    | 0.0164    | 0.0172    | 0.0109    | 0.0218    | 0.0169    | 0.0202    | 0.0192     |
| 6-3-0-0       | 0.0084    | 0.0254    | 0.0313    | 0.0294    | 0.0017    | 0.0391    | 0.0051    | 0.0214    | 0.0181    | 0.0216     |
| 3-5-0-1       | 0.0495    | 0.0806    | 0.1212    | 0.0953    | 0.0610    | 0.0718    | 0.0871    | 0.0999    | 0.0632    | 0.1066     |
| 2-8-0-0 Iso 1 | 0.0220    | 0.0265    | 0.0227    | 0.0216    | 0.0318    | 0.0314    | 0.0175    | 0.0250    | 0.0280    | 0.0302     |
| 2-8-0-0 Iso 2 | 0.1312    | 0.2354    | 0.0977    | 0.1400    | 0.1240    | 0.1852    | 0.1138    | 0.1409    | 0.1493    | 0.1996     |
| 4-4-0-1       | 0.1131    | 0.1392    | 0.5508    | 0.0817    | 0.0485    | 0.0760    | 0.0384    | 0.0597    | 0.1084    | 0.1042     |
| 4-5-1-0       | 0.0518    | 0.0489    | 0.4286    | 0.0319    | 0.0238    | 0.0345    | 0.0283    | 0.0242    | 0.0464    | 0.0411     |
| 2-9-0-0       | 0.3816    | 0.6271    | 0.2319    | 0.4306    | 0.4663    | 0.5592    | 0.3694    | 0.4201    | 0.4090    | 0.5464     |
| 4-5-0-1       | 7.2440    | 7.0037    | 7.2038    | 5.1859    | 4.3125    | 3.9517    | 3.3854    | 4.7242    | 6.6814    | 5.0279     |
| 4-6-1-0       | 0.6638    | 0.8245    | 0.8570    | 0.5977    | 0.2333    | 0.3918    | 0.1518    | 0.4815    | 0.5123    | 0.5544     |
| 5-5-1-0       | 0.0367    | 0.0248    | 0.2888    | 0.0198    | 0.0291    | 0.0214    | 0.0370    | 0.0200    | 0.0360    | 0.0326     |
| 2-10-0-0      | 0.0064    | 0.0070    | 0.0006    | 0.0050    | 0.0067    | 0.0070    | 0.0046    | 0.0067    | 0.0052    | 0.0065     |
| 4-5-1-1 Iso 1 | 0.5186    | 0.5142    | 0.6062    | 0.5207    | 0.3213    | 0.4804    | 0.6593    | 0.4245    | 0.5409    | 0.5724     |
| 4-5-1-1 Iso 2 | 0.4441    | 0.4245    | 1.9288    | 0.2856    | 0.3889    | 0.3952    | 0.6404    | 0.3440    | 0.4274    | 0.3479     |
| 4-6-0-1       | 0.0637    | 0.0483    | 0.0663    | 0.0540    | 0.0609    | 0.0490    | 0.0505    | 0.0553    | 0.0639    | 0.0505     |
| 5-5-0-1       | 0.0178    | 0.0024    | 0.1052    | 0.0274    | 0.0099    | 0.0607    | 0.0017    | 0.0018    | 0.0204    | 0.0248     |
| 5-6-1-0       | 0.0111    | 0.0197    | 0.0607    | 0.0154    | 0.0027    | 0.0266    | 0.0020    | 0.0015    | 0.0104    | 0.0135     |
| 7-3-2-0       | 0.0934    | 0.3074    | 0.1801    | 0.1311    | 0.2918    | 0.2256    | 0.3883    | 0.2097    | 0.0885    | 0.2975     |
| 4-5-0-2 Iso 1 | 5.4211    | 3.9296    | 2.8732    | 3.7768    | 3.9655    | 3.6692    | 1.0556    | 2.8655    | 5.6290    | 2.8540     |
| 4-5-0-2 Iso 2 | 58.8840   | 56.6065   | 58.8840   | 60.2434   | 63.0425   | 60.1393   | 59.3210   | 62.7986   | 57.8700   | 63.6476    |
| 5-5-1-1       | 0.0510    | 0.0583    | 2.0581    | 0.0509    | 0.0611    | 0.0631    | 0.3271    | 0.0466    | 0.0509    | 0.0712     |
| 5-6-0-1 Iso 1 | 0.0659    | 0.0982    | 0.0940    | 0.0507    | 0.0498    | 0.0654    | 0.0344    | 0.0934    | 0.0892    | 0.0692     |
| 5-6-0-1 Iso 2 | 0.3381    | 0.4689    | 0.2134    | 0.2336    | 0.3210    | 0.3372    | 0.2931    | 0.3296    | 0.3311    | 0.3230     |
| 6-7-1-0       | 0.1058    | 0.1363    | 0.0711    | 0.0801    | 0.0593    | 0.0812    | 0.0534    | 0.1060    | 0.0899    | 0.0925     |
| 5-8-0-0 Iso 1 | 0.4131    | 0.1079    | 0.1735    | 0.0487    | 0.1073    | 0.0486    | 0.0745    | 0.0660    | 0.4071    | 0.0630     |
| 5-8-0-0 Iso 2 | 0.9251    | 0.2737    | 0.4153    | 0.2034    | 0.2236    | 0.1107    | 0.1997    | 0.1390    | 0.7123    | 0.1137     |
| 4-5-1-2 Iso 1 | 1.5101    | 1.1335    | 1.9714    | 2.1173    | 0.3853    | 1.5698    | 1.7567    | 1.2811    | 1.6155    | 1.4660     |
| 4-5-1-2 Iso 2 | 0.8242    | 0.8835    | 0.8905    | 0.7334    | 0.6756    | 0.8671    | 0.8640    | 0.5546    | 0.8407    | 0.7829     |
| 4-5-1-2 Iso 3 | 0.4831    | 0.4308    | 0.3537    | 0.3662    | 0.4348    | 0.3512    | 0.4187    | 0.3571    | 0.4818    | 0.3902     |
| 4-5-1-2 Iso 4 | 6.6068    | 5.4742    | 4.2503    | 6.7720    | 6.1317    | 6.4235    | 12.6933   | 9.6036    | 6.9113    | 7.0063     |
| 4-6-0-2 Iso 1 | 0.0687    | 0.0425    | 0.0503    | 0.0796    | 0.0270    | 0.0580    | 0.0255    | 0.0452    | 0.0850    | 0.0389     |
| 4-6-0-2 Iso 2 | 0.0708    | 0.0477    | 0.0418    | 0.0921    | 0.0389    | 0.0483    | 0.0559    | 0.0982    | 0.0862    | 0.0831     |
| 5-6-1-1 Iso 1 | 0.0151    | 0.0229    | 0.0654    | 0.0137    | 0.0134    | 0.0185    | 0.0438    | 0.0175    | 0.0182    | 0.0197     |
| 5-6-1-1 Iso 2 | 0.0190    | 0.0157    | 0.0149    | 0.0115    | 0.0164    | 0.0146    | 0.0075    | 0.0101    | 0.0166    | 0.0184     |
| 5-6-1-1 Iso 3 | 0.0370    | 0.0338    | 0.0344    | 0.0233    | 0.0325    | 0.0393    | 0.0524    | 0.0314    | 0.0407    | 0.0387     |
| 5-6-1-1 Iso 4 | 0.0110    | 0.0090    | 0.0050    | 0.0042    | 0.0047    | 0.0070    | 0.0060    | 0.0059    | 0.0119    | 0.0059     |
| 4-5-2-2       | 0.0834    | 0.0287    | 0.0508    | 0.0761    | 0.0150    | 0.0420    | 0.1437    | 0.0658    | 0.0793    | 0.0367     |
| 5-6-0-2 Iso 1 | 0.1604    | 0.2142    | 0.1756    | 0.0989    | 0.1054    | 0.1024    | 0.0344    | 0.0669    | 0.1794    | 0.0609     |
| 5-6-0-2 Iso 2 | 0.2699    | 0.2518    | 0.1863    | 0.1759    | 0.1418    | 0.2738    | 0.1488    | 0.1350    | 0.2911    | 0.1861     |
| 5-6-0-2 Iso 3 | 0.2009    | 0.6723    | 0.1656    | 0.2930    | 0.4671    | 0.2673    | 0.2060    | 0.3779    | 0.2101    | 0.3056     |
| 5-6-0-2 Iso 4 | 0.1125    | 0.2016    | 0.1328    | 0.1337    | 0.1602    | 0.1725    | 0.1707    | 0.1430    | 0.1315    | 0.1418     |
| 8-6-0-0 Iso 1 | 0.2151    | 0.9854    | 0.4228    | 0.2638    | 1.3110    | 0.7276    | 0.2517    | 0.3602    | 0.2264    | 0.6312     |
| 8-6-0-0 Iso 2 | 0.0475    | 0.2442    | 0.1021    | 0.0916    | 0.2860    | 0.2925    | 0.3862    | 0.1642    | 0.0444    | 0.2304     |
| 6-7-0-1       | 0.0103    | 0.0186    | 0.0129    | 0.0073    | 0.0135    | 0.0134    | 0.0156    | 0.0100    | 0.0098    | 0.0069     |
| 5-6-1-2 Iso 1 | 0.1368    | 0.0868    | 0.3077    | 0.1152    | 0.0413    | 0.1409    | 0.0582    | 0.0786    | 0.1348    | 0.0841     |
| 5-6-1-2 Iso 2 | 0.0330    | 0.0272    | 0.0309    | 0.0283    | 0.0177    | 0.0278    | 0.0544    | 0.0298    | 0.0415    | 0.0201     |
| 5-6-1-2 Iso 3 | 0.0752    | 0.1354    | 0.1305    | 0.1804    | 0.0516    | 0.1216    | 0.2836    | 0.1526    | 0.0873    | 0.1095     |
| 5-6-1-2 Iso 4 | 0.0310    | 0.0355    | 0.0301    | 0.0286    | 0.0348    | 0.0411    | 0.0489    | 0.0294    | 0.0612    | 0.0462     |
| 5-6-1-2 Iso 5 | 0.0334    | 0.0349    | 0.0222    | 0.0280    | 0.0298    | 0.0301    | 0.0351    | 0.0305    | 0.0004    | 0.0347     |
| 5-6-1-2 Iso 6 | 0.0460    | 0.0509    | 0.0393    | 0.0324    | 0.0452    | 0.0426    | 0.0553    | 0.0429    | 0.0006    | 0.0441     |
| 5-6-0-3 Iso 1 | 4.0789    | 5.9144    | 3.1909    | 3.6749    | 7.2926    | 4.2940    | 1.4062    | 3.1820    | 4.6367    | 3.6386     |
| 5-6-0-3 Iso 2 | 1.1456    | 2.2481    | 0.9732    | 1.9684    | 2.1407    | 2.2416    | 2.4274    | 1.7802    | 1.1944    | 1.8674     |
| 6-7-0-2       | 0.0556    | 0.0766    | 0.0477    | 0.0362    | 0.0655    | 0.0544    | 0.0354    | 0.0365    | 0.0519    | 0.0304     |
| 5-6-1-3 Iso 1 | 0.3053    | 4.7631    | 0.7190    | 0.3447    | 0.1977    | 0.4509    | 0.1587    | 0.1605    | 0.3128    | 0.1962     |
| 5-6-1-3 Iso 2 | 4.0453    | 0.5901    | 5.4084    | 6.3383    | 2.6504    | 6.0621    | 6.8198    | 4.7388    | 4.1892    | 3.9242     |
| 5-6-1-3 Iso 3 | 0.4814    | 0.0102    | 0.2044    | 0.4510    | 0.6894    | 0.4008    | 0.2927    | 0.4252    | 0.4966    | 0.3581     |
| 5-8-3-1 Iso 1 | 0.0125    | 0.0123    | 0.0053    | 0.0128    | 0.0025    | 0.0096    | 0.0024    | 0.0104    | 0.0144    | 0.0125     |
| 5-8-3-1 Iso 2 | 0.0158    | 0.0127    | 0.0022    | 0.0081    | 0.0003    | 0.0101    | 0.0011    | 0.0206    | 0.0127    | 0.0075     |
| 5-8-3-1 Iso 3 | 0.0292    | 0.0379    | 0.0083    | 0.0426    | 0.0371    | 0.0293    | 0.0785    | 0.0392    | 0.0231    | 0.0272     |
| 6-7-1-2       | 0.0118    | 0.0129    | 0.0226    | 0.0117    | 0.0054    | 0.0168    | 0.0310    | 0.0101    | 0.0130    | 0.0087     |
| 5-6-2-3 Iso 1 | 0.1012    | 0.0500    | 0.1762    | 0.1437    | 0.0213    | 0.0908    | 0.1228    | 0.0547    | 0.1023    | 0.0517     |
| 5-6-2-3 Iso 2 | 0.4044    | 0.3654    | 0.1508    | 0.6336    | 0.1788    | 0.5050    | 1.1163    | 0.5065    | 0.4110    | 0.3479     |
| 6-7-0-3 Iso 1 | 0.0641    | 0.0831    | 0.0431    | 0.0357    | 0.0705    | 0.0728    | 0.0250    | 0.0300    | 0.0655    | 0.0314     |
| 6-7-0-3 Iso 2 | 0.0328    | 0.0392    | 0.0274    | 0.0210    | 0.0377    | 0.0335    | 0.0145    | 0.0171    | 0.0432    | 0.0185     |
| 6-7-0-3 Iso 3 | 0.0302    | 0.0620    | 0.0220    | 0.0224    | 0.0535    | 0.0479    | 0.0290    | 0.0263    | 0.0359    | 0.0306     |
| 6-9-2-1       | 0.0011    | 0.0006    | 0.0006    | 0.0013    | 0.0007    | 0.0045    | 0.0007    | 0.0028    | 0.0053    | 0.0034     |
| 6-7-1-3 Iso 1 | 0.0279    | 0.0325    | 0.0368    | 0.0209    | 0.0125    | 0.0366    | 0.0454    | 0.0141    | 0.0268    | 0.0135     |
| 6-7-1-3 Iso 2 | 0.0211    | 0.0146    | 0.0197    | 0.0142    | 0.0081    | 0.0370    | 0.0664    | 0.0236    | 0.0197    | 0.0179     |
| 6-7-1-3 Iso 3 | 0.0114    | 0.0251    | 0.0222    | 0.0232    | 0.0117    | 0.0371    | 0.0416    | 0.0192    | 0.0309    | 0.0135     |
| 6-7-0-4 Iso 1 | 0.1838    | 0.1546    | 0.1327    | 0.1078    | 0.1662    | 0.3899    | 0.0325    | 0.2457    | 0.4701    | 0.2720     |
| 6-7-0-4 Iso 2 | 0.1145    | 0.1487    | 0.0416    | 0.0885    | 0.1817    | 0.1569    | 0.0548    | 0.0599    | 0.1188    | 0.0786     |
| 6-7-0-4 Iso 3 | 0.0144    | 0.0119    | 0.0050    | 0.0035    | 0.0061    | 0.0148    | 0.0075    | 0.0063    | 0.0209    | 0.0059     |
| 6-7-1-4 Iso 1 | 0.0381    | 0.0292    | 0.0242    | 0.0263    | 0.0152    | 0.0435    | 0.0224    | 0.0166    | 0.0389    | 0.0157     |
| 6-7-1-4 Iso 2 | 0.0911    | 0.0608    | 0.0736    | 0.0626    | 0.0391    | 0.1005    | 0.0585    | 0.0253    | 0.0827    | 0.0356     |
| 6-7-1-4 Iso 3 | 0.0381    | 0.0235    | 0.0090    | 0.0247    | 0.0244    | 0.0301    | 0.0272    | 0.0259    | 0.0420    | 0.0230     |
| 6-7-1-4 Iso 4 | 0.0890    | 0.1057    | 0.0625    | 0.1116    | 0.0668    | 0.1913    | 0.1145    | 0.0666    | 0.1052    | 0.0710     |
| 6-7-1-4 Iso 5 | 0.0430    | 0.0318    | 0.0175    | 0.0394    | 0.0305    | 0.0516    | 0.0523    | 0.0329    | 0.0466    | 0.0257     |
| 6-7-1-4 Iso 6 | 0.0322    | 0.0280    | 0.0149    | 0.0285    | 0.0172    | 0.0687    | 0.1533    | 0.0272    | 0.0260    | 0.0298     |
| 6-7-2-4 Iso 1 | 0.0510    | 0.0285    | 0.1337    | 0.0453    | 0.0103    | 0.0683    | 0.0792    | 0.0248    | 0.0519    | 0.0232     |
| 6-7-2-4 Iso 2 | 0.0502    | 0.0430    | 0.0516    | 0.0880    | 0.0148    | 0.1244    | 0.3263    | 0.0510    | 0.0547    | 0.0531     |

**Supplementary Table S3.** MGC analysis, normalized abundance of all identified *N*-glycans digested from depleted low abundant serum glycoproteins of **MCI** patients. GlcNAc, Hex, Fuc, NeuAc (*N*-acetylglucosamine, Hexose, Fucose, *N*-acetylneuraminic acid), and Iso = isomer.

| Glycan        | MCI 1   | MCI 2   | MCI 3   | MCI 4   | MCI 5   | MCI 6   | MCI 7   | MCI 8   | MCI 9   | MCI 10  |
|---------------|---------|---------|---------|---------|---------|---------|---------|---------|---------|---------|
| 2-5-0-0       | 0.2834  | 0.4780  | 0.4498  | 0.2971  | 0.1942  | 0.2317  | 0.3037  | 0.1262  | 0.3127  | 0.2269  |
| 2-6-0-0       | 0.8211  | 1.2638  | 1.1297  | 0.6215  | 0.5843  | 0.0646  | 0.5812  | 0.3519  | 0.7565  | 0.4086  |
| 3-5-0-0       | 0.0060  | 0.0093  | 0.0090  | 0.0059  | 0.0074  | 0.0093  | 0.0103  | 0.0111  | 0.0083  | 0.0087  |
| 2-7-0-0       | 0.0870  | 0.1359  | 0.1541  | 0.0737  | 0.0863  | 0.0481  | 0.0935  | 0.0718  | 0.1007  | 0.0728  |
| 3-6-0-0       | 0.0193  | 0.0259  | 0.0201  | 0.0155  | 0.0142  | 0.0126  | 0.0138  | 0.0122  | 0.0206  | 0.0148  |
| 6-3-0-0       | 0.0030  | 0.0215  | 0.0139  | 0.0065  | 0.0084  | 0.0284  | 0.0109  | 0.0492  | 0.0088  | 0.0205  |
| 3-5-0-1       | 0.0813  | 0.0638  | 0.0809  | 0.0547  | 0.0819  | 0.0432  | 0.0761  | 0.0566  | 0.0657  | 0.0721  |
| 2-8-0-0 Iso 1 | 0.0254  | 0.0334  | 0.0349  | 0.0260  | 0.0248  | 0.0133  | 0.0225  | 0.0075  | 0.1046  | 0.0234  |
| 2-8-0-0 Iso 2 | 0.1262  | 0.2307  | 0.2618  | 0.1211  | 0.1061  | 0.0561  | 0.1091  | 0.0652  | 0.0210  | 0.0984  |
| 4-4-0-1       | 0.0649  | 0.0883  | 0.0917  | 0.0578  | 0.0699  | 0.0840  | 0.0931  | 0.0710  | 0.0738  | 0.0786  |
| 4-5-1-0       | 0.0383  | 0.0323  | 0.0289  | 0.0183  | 0.0252  | 0.0256  | 0.0442  | 0.0457  | 0.0334  | 0.0347  |
| 2-9-0-0       | 0.4236  | 0.5567  | 0.7136  | 0.2997  | 0.3273  | 0.1743  | 0.3110  | 0.2172  | 0.3084  | 0.2396  |
| 4-5-0-1       | 4.8679  | 4.7575  | 5.7114  | 4.2085  | 5.8959  | 5.3967  | 5.7309  | 7.0733  | 6.7048  | 5.4152  |
| 4-6-1-0       | 0.5404  | 0.4786  | 0.4937  | 0.3981  | 0.5587  | 0.3932  | 0.6387  | 0.6549  | 0.3865  | 0.4014  |
| 5-5-1-0       | 0.0378  | 0.0294  | 0.0220  | 0.0164  | 0.0209  | 0.0127  | 0.0251  | 0.0194  | 0.0162  | 0.0341  |
| 2-10-0-0      | 0.0047  | 0.0050  | 0.0071  | 0.0019  | 0.0035  | 0.0008  | 0.0035  | 0.0031  | 0.0044  | 0.0029  |
| 4-5-1-1 Iso 1 | 0.5503  | 0.3689  | 0.2110  | 0.2608  | 0.2651  | 0.4474  | 0.4039  | 0.4778  | 0.3806  | 0.5229  |
| 4-5-1-1 Iso 2 | 0.4762  | 0.4187  | 0.3837  | 0.2473  | 0.2372  | 0.2688  | 0.4351  | 0.4355  | 0.3929  | 0.3564  |
| 4-6-0-1       | 0.0386  | 0.0391  | 0.0288  | 0.0471  | 0.0711  | 0.0549  | 0.0503  | 0.0548  | 0.0548  | 0.0633  |
| 5-5-0-1       | 0.1435  | 0.1537  | 0.2940  | 0.0312  | 0.0752  | 0.0386  | 0.0401  | 0.0990  | 0.0197  | 0.1018  |
| 5-6-1-0       | 0.0477  | 0.0492  | 0.0634  | 0.0152  | 0.0363  | 0.0230  | 0.0186  | 0.0262  | 0.0057  | 0.0531  |
| 7-3-2-0       | 0.3166  | 0.3255  | 0.3481  | 0.2884  | 0.2205  | 0.2417  | 0.1069  | 0.3493  | 0.1100  | 0.2030  |
| 4-5-0-2 Iso 1 | 6.8737  | 3.7390  | 3.9804  | 4.6741  | 4.4622  | 4.1103  | 5.0539  | 4.3191  | 4.7413  | 4.2374  |
| 4-5-0-2 Iso 2 | 59.5276 | 58.2603 | 55.7573 | 65.6223 | 66.4865 | 65.8428 | 57.1079 | 58.9837 | 56.9693 | 62.8614 |
| 5-5-1-1       | 0.0905  | 0.0210  | 0.0159  | 0.0179  | 0.0192  | 0.0131  | 0.0182  | 0.0057  | 0.0050  | 0.0377  |
| 5-6-0-1 Iso 1 | 0.0293  | 0.1013  | 0.1551  | 0.0902  | 0.0997  | 0.0662  | 0.0765  | 0.0899  | 0.0895  | 0.0763  |
| 5-6-0-1 Iso 2 | 0.1755  | 0.2703  | 0.2235  | 0.1701  | 0.3414  | 0.3016  | 0.2472  | 0.2318  | 0.2496  | 0.3413  |
| 6-7-1-0       | 0.0359  | 0.2703  | 0.0387  | 0.0486  | 0.0785  | 0.0827  | 0.0674  | 0.0429  | 0.0360  | 0.0794  |
| 5-8-0-0 Iso 1 | 0.1049  | 0.1472  | 0.0502  | 0.1001  | 0.0486  | 0.0431  | 0.1207  | 0.0978  | 0.1734  | 0.0745  |
| 5-8-0-0 Iso 2 | 0.1488  | 0.1692  | 0.0758  | 0.2025  | 0.1398  | 0.0793  | 0.1725  | 0.2193  | 0.2480  | 0.1873  |
| 4-5-1-2 Iso 1 | 1.5639  | 0.9171  | 0.2681  | 0.7516  | 0.2236  | 1.7712  | 0.6093  | 1.3326  | 0.7440  | 1.4505  |
| 4-5-1-2 Iso 2 | 1.2082  | 0.5372  | 0.3308  | 0.5278  | 0.6316  | 0.7633  | 0.9444  | 0.8560  | 0.7755  | 0.8569  |
| 4-5-1-2 Iso 3 | 0.3661  | 0.4728  | 0.4376  | 0.2721  | 0.2932  | 0.3514  | 0.5173  | 0.4032  | 0.5727  | 0.3628  |
| 4-5-1-2 Iso 4 | 2.3611  | 6.1349  | 4.9173  | 4.4043  | 3.0634  | 5.4740  | 5.2623  | 5.8268  | 6.6937  | 5.0323  |
| 4-6-0-2 Iso 1 | 0.0459  | 0.0208  | 0.0225  | 0.0426  | 0.0411  | 0.0481  | 0.0625  | 0.1136  | 0.0841  | 0.0633  |
| 4-6-0-2 Iso 2 | 0.0330  | 0.0486  | 0.0316  | 0.0515  | 0.0402  | 0.0530  | 0.1434  | 0.1691  | 0.1518  | 0.0626  |
| 5-6-1-1 Iso 1 | 0.0153  | 0.0148  | 0.0178  | 0.0161  | 0.0117  | 0.0089  | 0.0195  | 0.0216  | 0.0187  | 0.0229  |
| 5-6-1-1 Iso 2 | 0.0215  | 0.0121  | 0.0097  | 0.0082  | 0.0108  | 0.0104  | 0.0197  | 0.0131  | 0.0135  | 0.0198  |
| 5-6-1-1 Iso 3 | 0.0417  | 0.0434  | 0.0293  | 0.0231  | 0.0243  | 0.0274  | 0.0367  | 0.0366  | 0.0371  | 0.0313  |
| 5-6-1-1 Iso 4 | 0.0095  | 0.0077  | 0.0068  | 0.0054  | 0.0045  | 0.0037  | 0.0082  | 0.0061  | 0.0076  | 0.0064  |
| 4-5-2-2       | 0.0107  | 0.0337  | 0.0100  | 0.0158  | 0.0037  | 0.0563  | 0.0233  | 0.0768  | 0.0254  | 0.0622  |
| 5-6-0-2 Iso 1 | 0.1774  | 0.1544  | 0.3058  | 0.1026  | 0.1395  | 0.1055  | 0.2515  | 0.1734  | 0.2934  | 0.1553  |
| 5-6-0-2 Iso 2 | 0.1522  | 0.1267  | 0.1131  | 0.1245  | 0.1771  | 0.2298  | 0.3069  | 0.3006  | 0.2479  | 0.2196  |
| 5-6-0-2 Iso 3 | 0.1641  | 0.5521  | 0.7995  | 0.3156  | 0.5704  | 0.2176  | 0.3963  | 0.2835  | 0.6703  | 0.2710  |
| 5-6-0-2 Iso 4 | 0.0671  | 0.1429  | 0.1379  | 0.1017  | 0.1431  | 0.1365  | 0.1522  | 0.1417  | 0.1532  | 0.1436  |
| 8-6-0-0 Iso 1 | 1.9909  | 1.3263  | 2.4529  | 1.0356  | 1.1452  | 0.4991  | 0.6818  | 0.6544  | 0.5750  | 0.6273  |
| 8-6-0-0 Iso 2 | 0.2664  | 0.4854  | 0.6177  | 0.2500  | 0.1839  | 0.1554  | 0.1112  | 0.2220  | 0.1034  | 0.1779  |
| 6-7-0-1       | 0.0056  | 0.0103  | 0.0117  | 0.0056  | 0.0135  | 0.0076  | 0.0102  | 0.0100  | 0.0137  | 0.0109  |
| 5-6-1-2 Iso 1 | 0.0817  | 0.0667  | 0.0357  | 0.0510  | 0.0304  | 0.1079  | 0.0828  | 0.2794  | 0.0942  | 0.1402  |
| 5-6-1-2 Iso 2 | 0.0175  | 0.0183  | 0.0125  | 0.0137  | 0.0181  | 0.0390  | 0.0210  | 0.0222  | 0.0222  | 0.0426  |
| 5-6-1-2 Iso 3 | 0.0561  | 0.0984  | 0.0394  | 0.0503  | 0.0358  | 0.1051  | 0.0583  | 0.1113  | 0.0938  | 0.1153  |
| 5-6-1-2 Iso 4 | 0.0486  | 0.0364  | 0.0346  | 0.0254  | 0.0208  | 0.0361  | 0.0508  | 0.0422  | 0.0600  | 0.0590  |
| 5-6-1-2 Iso 5 | 0.0337  | 0.0316  | 0.0262  | 0.0190  | 0.0221  | 0.0278  | 0.0389  | 0.0362  | 0.0397  | 0.0307  |
| 5-6-1-2 Iso 6 | 0.0310  | 0.0514  | 0.0460  | 0.0311  | 0.0339  | 0.0342  | 0.0523  | 0.0563  | 0.0714  | 0.0413  |
| 5-6-0-3 Iso 1 | 7.4523  | 6.0140  | 10.8348 | 6.3361  | 7.3109  | 3.4140  | 9.3435  | 6.9491  | 7.9141  | 4.4848  |
| 5-6-0-3 Iso 2 | 1.4053  | 2.8727  | 2.9837  | 2.2017  | 2.0402  | 1.4541  | 2.2475  | 1.1881  | 2.1548  | 1.5379  |
| 6-7-0-2       | 0.0365  | 0.0440  | 0.0590  | 0.0249  | 0.0481  | 0.0345  | 0.0743  | 0.0430  | 0.0661  | 0.0492  |
| 5-6-1-3 Iso 1 | 0.2558  | 0.3212  | 0.1564  | 0.2079  | 0.0807  | 0.2708  | 0.1643  | 0.6376  | 0.1582  | 0.3820  |
| 5-6-1-3 Iso 2 | 4.7291  | 4.7101  | 1.8722  | 3.2158  | 1.4437  | 4.5971  | 3.4770  | 4.0243  | 3.5876  | 5.3331  |
| 5-6-1-3 Iso 3 | 0.1531  | 0.5376  | 1.0168  | 0.3689  | 0.2842  | 0.2729  | 0.8839  | 0.3071  | 0.8860  | 0.3646  |
| 5-8-3-1 Iso 1 | 0.0004  | 0.0098  | 0.0145  | 0.0074  | 0.0049  | 0.0087  | 0.0167  | 0.0073  | 0.0139  | 0.0098  |
| 5-8-3-1 Iso 2 | 0.0004  | 0.0268  | 0.0104  | 0.0146  | 0.0081  | 0.0092  | 0.0144  | 0.0097  | 0.0136  | 0.0168  |
| 5-8-3-1 Iso 3 | 0.0100  | 0.0361  | 0.0291  | 0.0232  | 0.0152  | 0.0203  | 0.0331  | 0.0159  | 0.0196  | 0.0213  |
| 6-7-1-2       | 0.0051  | 0.0076  | 0.0025  | 0.0037  | 0.0037  | 0.0091  | 0.0154  | 0.0074  | 0.0136  | 0.0089  |
| 5-6-2-3 Iso 1 | 0.1108  | 0.0391  | 0.0143  | 0.0367  | 0.0104  | 0.0874  | 0.0220  | 0.0370  | 0.0347  | 0.1053  |
| 5-6-2-3 Iso 2 | 0.1031  | 0.3991  | 0.1471  | 0.1538  | 0.0456  | 0.2583  | 0.2736  | 0.2547  | 0.3282  | 0.3455  |
| 6-7-0-3 Iso 1 | 0.0622  | 0.0554  | 0.0809  | 0.0399  | 0.0311  | 0.0384  | 0.1157  | 0.0417  | 0.0713  | 0.0560  |
| 6-7-0-3 Iso 2 | 0.0339  | 0.0290  | 0.0353  | 0.0215  | 0.0587  | 0.0239  | 0.0633  | 0.0338  | 0.0387  | 0.0382  |
| 6-7-0-3 Iso 3 | 0.0254  | 0.0474  | 0.0527  | 0.0373  | 0.0590  | 0.0310  | 0.0676  | 0.0332  | 0.0537  | 0.0346  |
| 6-9-2-1       | 0.0006  | 0.0053  | 0.0028  | 0.0041  | 0.0074  | 0.0036  | 0.0062  | 0.0019  | 0.0032  | 0.0039  |
| 6-7-1-3 Iso 1 | 0.0204  | 0.0187  | 0.0058  | 0.0106  | 0.0068  | 0.0216  | 0.0231  | 0.0228  | 0.0152  | 0.0257  |
| 6-7-1-3 Iso 2 | 0.0103  | 0.0182  | 0.0063  | 0.0091  | 0.0073  | 0.0226  | 0.0179  | 0.0236  | 0.0148  | 0.0149  |
| 6-7-1-3 Iso 3 | 0.0075  | 0.0079  | 0.0044  | 0.0060  | 0.0034  | 0.0120  | 0.0096  | 0.0224  | 0.0165  | 0.0232  |
| 6-7-0-4 Iso 1 | 0.3288  | 0.5165  | 0.8608  | 0.5774  | 0.7010  | 0.3167  | 0.4389  | 0.0655  | 0.1693  | 0.1674  |
| 6-7-0-4 Iso 2 | 0.1302  | 0.1070  | 0.1370  | 0.1485  | 0.1987  | 0.1182  | 0.4178  | 0.1764  | 0.1968  | 0.1757  |
| 6-7-0-4 Iso 3 | 0.0111  | 0.0108  | 0.0101  | 0.0139  | 0.0163  | 0.0116  | 0.0251  | 0.0202  | 0.0139  | 0.0113  |
| 6-7-1-4 Iso 1 | 0.0376  | 0.0150  | 0.0055  | 0.0208  | 0.0114  | 0.0380  | 0.0389  | 0.0322  | 0.0181  | 0.0363  |
| 6-7-1-4 Iso 2 | 0.0810  | 0.0409  | 0.0149  | 0.0375  | 0.0175  | 0.0728  | 0.0804  | 0.0576  | 0.0430  | 0.0744  |
| 6-7-1-4 Iso 3 | 0.0398  | 0.0248  | 0.0106  | 0.0256  | 0.0273  | 0.0339  | 0.0583  | 0.0554  | 0.0447  | 0.0431  |
| 6-7-1-4 Iso 4 | 0.0729  | 0.0824  | 0.0294  | 0.0704  | 0.0385  | 0.1169  | 0.0828  | 0.0641  | 0.0464  | 0.1007  |
| 6-7-1-4 Iso 5 | 0.0356  | 0.0306  | 0.0155  | 0.0263  | 0.0236  | 0.0428  | 0.0511  | 0.0358  | 0.0370  | 0.0397  |
| 6-7-1-4 Iso 6 | 0.0110  | 0.0258  | 0.0074  | 0.0211  | 0.0102  | 0.0367  | 0.0234  | 0.0283  | 0.0180  | 0.0286  |
| 6-7-2-4 Iso 1 | 0.0362  | 0.0213  | 0.0050  | 0.0207  | 0.0056  | 0.0572  | 0.0261  | 0.0369  | 0.0161  | 0.0552  |
| 6-7-2-4 Iso 2 | 0.0347  | 0.0371  | 0.0118  | 0.0313  | 0.0078  | 0.0887  | 0.0405  | 0.3036  | 0.0276  | 0.0575  |



**Supplementary Table S4.** C18(50cm) analysis, normalized abundance of all identified *N*-glycans digested from depleted low abundant serum glycoproteins of **control** patients. GlcNAc, Hex, Fuc, NeuAc (*N*-acetylglucosamine, Hexose, Fucose, *N*-acetylneuraminic acid), and Iso = isomer.

| Glycan        | Control 1 | Control 2 | Control 3 | Control 4 | Control 5 | Control 6 | Control 7 | Control 8 | Control 9 | Control 10 |
|---------------|-----------|-----------|-----------|-----------|-----------|-----------|-----------|-----------|-----------|------------|
| 2-5-0-0       | 0.5207    | 0.2402    | 0.6173    | 0.3578    | 0.4175    | 0.3519    | 0.2824    | 0.2020    | 0.3664    | 0.3322     |
| 2-6-0-0       | 1.0101    | 1.8573    | 1.1053    | 1.2868    | 1.2801    | 1.5172    | 1.2431    | 0.9616    | 1.3941    | 1.4963     |
| 2-7-0-0       | 0.1958    | 0.1462    | 0.1455    | 0.0905    | 0.1036    | 0.0985    | 0.2029    | 0.1496    | 0.1451    | 0.0931     |
| 2-8-0-0       | 0.4715    | 0.6680    | 0.4595    | 0.5309    | 0.5148    | 0.6103    | 0.4239    | 0.4886    | 0.5396    | 0.5998     |
| 2-9-0-0       | 0.6322    | 1.0261    | 0.5303    | 0.7732    | 1.0954    | 0.9453    | 0.6553    | 0.7816    | 0.7966    | 1.0193     |
| 3-4-0-0       | 0.0015    | 0.0037    | 0.0059    | 0.0023    | 0.0019    | 0.0015    | 0.0010    | 0.0019    | 0.0035    | 0.0025     |
| 3-4-0-1       | 0.2317    | 0.2311    | 0.3716    | 0.1676    | 0.1529    | 0.1454    | 0.0893    | 0.0545    | 0.1032    | 0.1726     |
| 3-4-1-0       | 0.0070    | 0.0036    | 0.0112    | 0.0027    | 0.0028    | 0.0026    | 0.0032    | 0.0526    | 0.0032    | 0.0028     |
| 3-4-1-1       | 0.0798    | 0.1512    | 0.1038    | 0.1443    | 0.1978    | 0.1815    | 0.1564    | 0.1771    | 0.1863    | 0.0929     |
| 3-5-0-1       | 0.2188    | 0.1292    | 0.2019    | 0.1527    | 0.1077    | 0.0025    | 0.0027    | 0.0034    | 0.0023    | 0.0035     |
| 3-5-1-0       | 0.0174    | 0.0181    | 0.0276    | 0.0118    | 0.0131    | 0.0099    | 0.0053    | 0.0026    | 0.0041    | 0.0082     |
| 3-5-2-1       | 0.0000    | 0.0194    | 0.0000    | 0.0382    | 0.0128    | 0.0077    | 0.0044    | 0.0816    | 0.0233    | 0.0158     |
| 3-6-0-0       | 0.0159    | 0.0040    | 0.0142    | 0.0023    | 0.0031    | 0.0029    | 0.0044    | 0.0017    | 0.0041    | 0.0029     |
| 3-6-0-1       | 0.0230    | 0.0515    | 0.0100    | 0.0258    | 0.0221    | 0.0132    | 0.0266    | 0.0286    | 0.0594    | 0.0237     |
| 3-6-1-0       | 0.0000    | 0.0412    | 0.0065    | 0.0192    | 0.0175    | 0.0004    | 0.0006    | 0.0010    | 0.0014    | 0.0008     |
| 3-7-1-0       | 0.0318    | 0.1073    | 0.0203    | 0.0522    | 0.0430    | 0.0336    | 0.0601    | 0.0906    | 0.1705    | 0.0705     |
| 4-3-0-0       | 0.0255    | 0.0016    | 0.1456    | 0.0011    | 0.0000    | 0.0005    | 0.0008    | 0.0006    | 0.0020    | 0.0010     |
| 4-4-0-0       | 0.0820    | 0.0173    | 0.2494    | 0.0064    | 0.0086    | 0.0047    | 0.0036    | 0.0044    | 0.0106    | 0.0080     |
| 4-4-0-1       | 0.3915    | 0.4812    | 0.4125    | 0.2294    | 0.2128    | 0.1786    | 0.0933    | 0.1140    | 0.2619    | 0.2851     |
| 4-4-1-0       | 3.9298    | 0.0237    | 4.8619    | 0.0089    | 0.0145    | 0.0153    | 0.0271    | 0.0061    | 0.0152    | 0.0127     |
| 4-4-2-1 Iso 1 | 0.0000    | 0.0057    | 0.0119    | 0.0083    | 0.0083    | 0.0087    | 0.0090    | 0.0027    | 0.0010    | 0.0078     |
| 4-4-2-1 Iso 2 | 0.0000    | 0.0026    | 0.0050    | 0.0024    | 0.0075    | 0.0078    | 0.0067    | 0.0023    | 0.0010    | 0.0073     |
| 4-4-3-0       | 0.0317    | 0.0186    | 0.0156    | 0.0122    | 0.0107    | 0.0192    | 0.3305    | 0.3208    | 0.2255    | 0.0594     |
| 4-5-0-0       | 0.1121    | 0.0460    | 0.1145    | 0.0267    | 0.0326    | 0.0198    | 0.0176    | 0.0180    | 0.0381    | 0.0256     |
| 4-5-0-1       | 4.8904    | 5.5832    | 4.4349    | 3.6175    | 3.4414    | 2.9725    | 2.1329    | 3.7549    | 5.2735    | 4.1911     |
| 4-5-0-2       | 43.1119   | 47.2432   | 42.2994   | 51.6054   | 48.8393   | 49.1119   | 43.8921   | 51.6657   | 50.0148   | 52.6853    |
| 4-5-1-0 Iso 1 | 0.0475    | 0.0549    | 0.0285    | 0.0279    | 0.0255    | 0.0228    | 0.0115    | 0.0124    | 0.0228    | 0.0291     |
| 4-5-1-0 Iso 2 | 1.4118    | 0.1176    | 1.2243    | 0.0692    | 0.0891    | 0.0850    | 0.1044    | 0.0454    | 0.1539    | 0.1059     |
| 4-5-1-1 Iso 1 | 1.7764    | 0.5876    | 1.4421    | 0.3935    | 0.4450    | 0.5110    | 0.7380    | 0.4064    | 0.4867    | 0.4013     |
| 4-5-1-1 Iso 2 | 0.2206    | 0.2670    | 0.3627    | 0.2874    | 0.1875    | 0.2651    | 0.3586    | 0.2389    | 0.3452    | 0.3085     |
| 4-5-1-2 Iso 1 | 6.4481    | 8.3752    | 6.3063    | 10.8751   | 8.7597    | 9.7987    | 15.8646   | 13.1195   | 10.6507   | 10.4746    |
| 4-5-1-2 Iso 2 | 0.4998    | 0.9759    | 1.1560    | 1.0847    | 1.0525    | 1.1956    | 0.8129    | 1.1360    | 1.0756    | 1.0632     |
| 4-5-3-2       | 0.2458    | 0.3001    | 0.2813    | 0.0739    | 0.4084    | 0.3242    | 0.1733    | 0.1295    | 0.0956    | 0.2992     |
| 4-6-2-0 Iso 1 | 0.2632    | 0.1048    | 0.1685    | 0.0481    | 0.0005    | 0.0752    | 0.0966    | 0.0591    | 0.0635    | 0.0573     |
| 4-6-2-0 Iso 2 | 0.0168    | 0.0331    | 0.0546    | 0.0356    | 0.0001    | 0.0328    | 0.0446    | 0.0276    | 0.0374    | 0.0250     |
| 4-6-1-0       | 0.6362    | 0.7036    | 0.4222    | 0.3299    | 0.3306    | 0.2876    | 0.1990    | 0.3680    | 0.5255    | 0.4727     |
| 4-6-0-1       | 0.0434    | 0.0868    | 0.0431    | 0.0747    | 0.0608    | 0.0691    | 0.0571    | 0.0685    | 0.0511    | 0.0677     |
| 4-6-0-2       | 0.0676    | 0.1363    | 0.1149    | 0.2362    | 0.1293    | 0.1154    | 0.0943    | 0.1364    | 0.1371    | 0.1280     |
| 4-6-1-1       | 2.5122    | 4.4622    | 3.1686    | 4.4029    | 4.4025    | 4.4992    | 3.5953    | 4.3033    | 3.8769    | 4.1207     |
| 4-6-2-1       | 0.6957    | 1.1273    | 0.7359    | 1.2154    | 1.1798    | 1.1495    | 1.7171    | 1.4543    | 1.0754    | 1.1450     |
| 5-3-0-0       | 0.2220    | 0.0057    | 0.5354    | 0.0020    | 0.0036    | 0.0055    | 0.0080    | 0.0017    | 0.0068    | 0.0026     |
| 5-3-1-0       | 0.5488    | 0.0130    | 2.3892    | 0.0103    | 0.0117    | 0.0143    | 0.0189    | 0.0063    | 0.0221    | 0.0144     |
| 5-4-0-1       | 0.0000    | 0.0286    | 0.0048    | 0.0303    | 0.0241    | 0.0122    | 0.0104    | 0.0282    | 0.0351    | 0.0258     |
| 5-4-1-0       | 0.8144    | 0.0370    | 1.7426    | 0.0219    | 0.0182    | 0.0295    | 0.0563    | 0.0233    | 0.0457    | 0.0357     |
| 5-4-1-1       | 0.1445    | 0.0115    | 0.3551    | 0.0080    | 0.0075    | 0.0110    | 0.0396    | 0.0085    | 0.0088    | 0.0086     |
| 5-5-0-0       | 0.0529    | 0.0020    | 0.0970    | 0.0018    | 0.0028    | 0.0026    | 0.0061    | 0.0018    | 0.0042    | 0.0032     |
| 5-5-0-1       | 0.0000    | 0.0895    | 0.1265    | 0.0457    | 0.0325    | 0.0937    | 0.0241    | 0.0097    | 0.0344    | 0.0424     |
| 5-5-0-2 Iso 1 | 0.0478    | 0.0456    | 0.0268    | 0.0236    | 0.0324    | 0.0204    | 0.0066    | 0.0098    | 0.0160    | 0.0137     |
| 5-5-0-2 Iso 2 | 0.0929    | 0.0139    | 0.1478    | 0.0076    | 0.0158    | 0.0145    | 0.4476    | 0.0247    | 0.0043    | 0.0292     |
| 5-5-1-0       | 0.0255    | 0.0016    | 0.1452    | 0.0011    | 0.0007    | 0.0005    | 0.0008    | 0.0006    | 0.0020    | 0.0010     |
| 5-5-1-1       | 1.4314    | 0.0738    | 2.4277    | 0.0706    | 0.0904    | 0.0912    | 0.5112    | 0.0735    | 0.0810    | 0.1079     |
| 5-5-1-2       | 2.2364    | 0.0881    | 2.1130    | 0.0898    | 0.1215    | 0.0997    | 0.7127    | 0.1021    | 0.0732    | 0.1115     |
| 5-6-0-1 Iso 1 | 0.1630    | 0.1523    | 0.0665    | 0.0009    | 0.0014    | 0.0493    | 0.0330    | 0.0463    | 0.0591    | 0.0390     |
| 5-6-0-1 Iso 2 | 0.3154    | 0.3219    | 0.2042    | 0.0020    | 0.0035    | 0.2781    | 0.2897    | 0.2600    | 0.2975    | 0.2225     |
| 5-6-0-3 Iso 1 | 2.1983    | 3.0772    | 2.1500    | 3.1926    | 3.8637    | 3.5474    | 4.2321    | 3.2258    | 2.2887    | 3.0114     |
| 5-6-0-3 Iso 2 | 6.8239    | 6.4728    | 4.0238    | 4.7425    | 4.4874    | 5.0151    | 2.1422    | 4.1076    | 5.5989    | 4.3895     |
| 5-6-0-3 Iso 3 | 1.3149    | 0.7673    | 0.5100    | 0.4907    | 8.8274    | 0.4226    | 0.2892    | 0.3392    | 0.7544    | 0.3649     |
| 5-6-0-3 Iso 4 | 0.4888    | 0.4691    | 0.4214    | 0.3952    | 0.8408    | 0.5839    | 0.2865    | 0.3961    | 0.4031    | 0.3323     |
| 5-6-0-4 Iso 1 | 0.0575    | 0.0078    | 0.0099    | 0.0177    | 0.0171    | 0.0095    | 0.0052    | 0.0127    | 0.0085    | 0.0126     |
| 5-6-0-4 Iso 2 | 0.1038    | 0.0033    | 0.0056    | 0.0049    | 0.0054    | 0.0045    | 0.0073    | 0.0052    | 0.0079    | 0.0038     |
| 5-6-1-1       | 0.1300    | 0.1563    | 0.1509    | 0.1239    | 0.1355    | 0.1848    | 0.2572    | 0.1431    | 0.1614    | 0.1744     |
| 5-6-1-2 Iso 1 | 0.0359    | 0.0643    | 0.0220    | 0.0577    | 0.0635    | 0.0419    | 0.0887    | 0.0814    | 0.0572    | 0.0516     |
| 5-6-1-2 Iso 2 | 0.3012    | 0.3261    | 0.4056    | 0.4348    | 0.1585    | 0.3172    | 0.6238    | 0.3592    | 0.3226    | 0.2992     |
| 5-6-1-2 Iso 3 | 0.0628    | 0.1125    | 0.1054    | 0.1098    | 0.0849    | 0.1539    | 0.2150    | 0.1249    | 0.1421    | 0.1576     |
| 5-6-1-2 Iso 4 | 0.0616    | 0.0356    | 0.0263    | 0.0332    | 0.0370    | 0.0420    | 0.0495    | 0.0331    | 0.0499    | 0.0453     |
| 5-6-1-3 Iso 1 | 0.1336    | 0.3380    | 0.1046    | 0.4223    | 0.4056    | 0.2958    | 0.7900    | 0.4201    | 0.2490    | 0.2984     |
| 5-6-1-3 Iso 2 | 4.1108    | 4.3758    | 4.8011    | 5.5938    | 3.4430    | 5.4948    | 5.7252    | 4.6276    | 4.7106    | 4.4399     |
| 5-6-1-3 Iso 3 | 0.1340    | 0.1941    | 0.1695    | 0.1838    | 0.1563    | 0.1020    | 0.1408    | 0.0849    | 0.1504    | 0.1311     |
| 5-6-2-3 Iso 1 | 0.2074    | 0.5066    | 0.2581    | 0.8642    | 0.3319    | 0.6755    | 1.5218    | 0.7202    | 0.6711    | 0.5329     |
| 5-6-2-3 Iso2  | 0.1216    | 0.1738    | 0.3051    | 0.3372    | 0.0508    | 0.2381    | 0.2533    | 0.1500    | 0.2427    | 0.1499     |
| 5-7-1-0       | 0.0034    | 0.0068    | 0.0000    | 0.0009    | 0.0013    | 0.0011    | 0.0008    | 0.0015    | 0.0130    | 0.0010     |
| 5-7-1-1       | 0.1163    | 0.1536    | 0.0689    | 0.0839    | 0.1366    | 0.1079    | 0.0827    | 0.1038    | 0.0845    | 0.0993     |
| 5-7-2-0       | 0.0095    | 0.0112    | 0.0091    | 0.0056    | 0.0082    | 0.0131    | 0.0167    | 0.0097    | 0.0074    | 0.0122     |
| 5-7-1-2 Iso 1 | 0.9874    | 0.3023    | 0.2519    | 0.3661    | 0.4037    | 0.7140    | 0.5908    | 0.5785    | 0.5178    | 0.5389     |
| 5-7-1-2 Iso2  | 0.0745    | 0.0727    | 0.0665    | 0.0559    | 0.0808    | 0.0867    | 0.0512    | 0.0568    | 0.0648    | 0.0602     |
| 6-4-1-1       | 0.4007    | 0.2252    | 0.0857    | 0.1223    | 0.0726    | 0.1093    | 0.2173    | 0.1363    | 0.2033    | 0.0862     |
| 6-5-1-0       | 0.0000    | 0.0109    | 0.0056    | 0.0013    | 0.0112    | 0.0055    | 0.0073    | 0.0055    | 0.0028    | 0.0027     |
| 6-6-0-2       | 0.0294    | 0.0426    | 0.0440    | 0.0141    | 0.0148    | 0.0723    | 0.0000    | 0.0000    | 0.0266    | 0.0246     |
| 6-6-1-2       | 0.0000    | 0.0142    | 0.0302    | 0.0119    | 0.0037    | 0.0326    | 0.0177    | 0.0029    | 0.0059    | 0.0066     |
| 6-6-1-3       | 0.0095    | 0.0119    | 0.0146    | 0.0127    | 0.0118    | 0.0143    | 0.0726    | 0.0194    | 0.0095    | 0.0148     |
| 6-7-0-1       | 0.0566    | 0.0764    | 0.0341    | 0.0324    | 0.0578    | 0.0535    | 0.0663    | 0.0445    | 0.0384    | 0.0348     |
| 6-7-0-2       | 0.2638    | 0.2394    | 0.1444    | 0.1369    | 0.2094    | 0.2160    | 0.1957    | 0.1506    | 0.2027    | 0.1304     |
| 6-7-0-3       | 0.5703    | 0.5656    | 0.2778    | 0.2887    | 0.5878    | 0.4793    | 0.3264    | 0.2989    | 0.4404    | 0.3059     |
| 6-7-0-4 Iso 1 | 0.0169    | 0.0237    | 0.0085    | 0.0207    | 0.0336    | 0.0408    | 0.0223    | 0.0178    | 0.0178    | 0.0265     |
| 6-7-0-4 Iso 2 | 0.0552    | 0.0620    | 0.0212    | 0.0383    | 0.0544    | 0.0699    | 0.0307    | 0.0356    | 0.0674    | 0.0439     |
| 6-7-0-4 Iso 3 | 0.0517    | 0.0359    | 0.0250    | 0.0250    | 0.0267    | 0.0367    | 0.0120    | 0.0171    | 0.0555    | 0.0195     |
| 6-7-1-1       | 0.0125    | 0.0189    | 0.0120    | 0.0118    | 0.0129    | 0.0189    | 0.0427    | 0.0101    | 0.0147    | 0.0198     |
| 6-7-1-2 Iso 1 | 0.0776    | 0.0782    | 0.0825    | 0.0709    | 0.0540    | 0.0864    | 0.1622    | 0.0675    | 0.0755    | 0.0670     |
| 6-7-1-2 Iso 2 | 0.0040    | 0.0160    | 0.0103    | 0.0156    | 0.0163    | 0.0214    | 0.0250    | 0.0177    | 0.0306    | 0.0311     |
| 6-7-1-2 Iso 3 | 0.0000    | 0.0049    | 0.0022    | 0.0048    | 0.0028    | 0.0056    | 0.0061    | 0.0054    | 0.0070    | 0.0067     |
| 6-7-1-3       | 0.2057    | 0.2672    | 0.2507    | 0.2649    | 0.1252    | 0.3112    | 0.4906    | 0.2358    | 0.2641    | 0.2001     |

## Supplementary Table S4. Continued...

| Glycan        | Control 1 | Control 2 | Control 3 | Control 4 | Control 5 | Control 6 | Control 7 | Control 8 | Control 9 | Control 10 |
|---------------|-----------|-----------|-----------|-----------|-----------|-----------|-----------|-----------|-----------|------------|
| 6-7-1-4 Iso 1 | 0.0425    | 0.1063    | 0.2078    | 0.1643    | 0.1638    | 0.2613    | 0.5521    | 0.1535    | 0.1100    | 0.1437     |
| 6-7-1-4 Iso 2 | 0.1937    | 0.2966    | 0.0729    | 0.3454    | 0.2285    | 0.5006    | 0.4312    | 0.2462    | 0.3709    | 0.2595     |
| 6-7-1-4 Iso 3 | 0.1679    | 0.1990    | 0.1903    | 0.2249    | 0.0847    | 0.3227    | 0.1780    | 0.1727    | 0.3721    | 0.1747     |
| 6-7-2-4 Iso 1 | 0.0384    | 0.0992    | 0.0955    | 0.1939    | 0.0491    | 0.2468    | 0.6319    | 0.1350    | 0.1640    | 0.1285     |
| 6-7-2-4 Iso 2 | 0.0894    | 0.0986    | 0.1451    | 0.1986    | 0.0468    | 0.2312    | 0.3201    | 0.0995    | 0.1946    | 0.1008     |
| 6-7-3-4       | 0.0296    | 0.0299    | 0.0708    | 0.0530    | 0.0083    | 0.1016    | 0.1629    | 0.0315    | 0.0737    | 0.0358     |
| 6-7-1-0       | 0.0000    | 0.0128    | 0.0049    | 0.0052    | 0.0107    | 0.0089    | 0.0109    | 0.0081    | 0.0056    | 0.0043     |
| 6-8-1-1       | 0.0000    | 0.0220    | 0.0124    | 0.0121    | 0.0149    | 0.0236    | 0.0396    | 0.0126    | 0.0118    | 0.0149     |
| 7-8-0-4       | 0.0281    | 0.0305    | 0.0150    | 0.0199    | 0.0417    | 0.0326    | 0.0145    | 0.0283    | 0.0187    | 0.0188     |
| 7-8-1-3       | 0.0000    | 0.0257    | 0.0149    | 0.0219    | 0.0182    | 0.0262    | 0.0350    | 0.0271    | 0.0218    | 0.0273     |
| 7-8-1-4       | 0.0000    | 0.0293    | 0.0148    | 0.0314    | 0.0274    | 0.0376    | 0.0338    | 0.0295    | 0.0324    | 0.0233     |
| 7-8-2-4 Iso 1 | 0.0000    | 0.0028    | 0.0026    | 0.0046    | 0.0011    | 0.0047    | 0.0120    | 0.0044    | 0.0023    | 0.0022     |
| 7-8-2-4 Iso 2 | 0.0000    | 0.0085    | 0.0067    | 0.0077    | 0.0009    | 0.0185    | 0.0185    | 0.0072    | 0.0078    | 0.0061     |
| 8-6-0-0       | 1.7843    | 2.1404    | 1.2561    | 0.9521    | 3.0287    | 1.9990    | 1.4938    | 1.1066    | 0.9833    | 1.5741     |
| 8-6-0-1 Iso 1 | 0.3339    | 0.3791    | 0.1876    | 0.1461    | 0.5340    | 0.2437    | 0.1363    | 0.0983    | 0.1098    | 0.2152     |
| 8-6-0-1 Iso 2 | 0.7326    | 0.5008    | 0.3272    | 0.1380    | 0.6376    | 0.3968    | 0.2887    | 0.1882    | 0.4059    | 0.2675     |
| 8-6-0-1 Iso 3 | 0.2999    | 0.3100    | 0.3687    | 0.2451    | 0.2075    | 0.4406    | 0.4918    | 0.2301    | 0.1821    | 0.2859     |
| 8-6-0-1 Iso 4 | 0.0163    | 0.0496    | 0.0199    | 0.0176    | 0.0635    | 0.0569    | 0.0348    | 0.0235    | 0.0303    | 0.0141     |

**Supplementary Table S5.** C18(50cm) analysis, normalized abundance of all identified *N*-glycans digested from depleted low abundant serum glycoproteins of **MCI** patients. GlcNAc, Hex, Fuc, NeuAc (*N*-acetylglucosamine, Hexose, Fucose, *N*-acetylneuraminic acid), and Iso = isomer.

| Glycan        | MCI 1   | MCI 2   | MCI 3   | MCI 4   | MCI 5   | MCI 6   | MCI 7   | MCI 8   | MCI 9   | MCI 10  |
|---------------|---------|---------|---------|---------|---------|---------|---------|---------|---------|---------|
| 2-5-0-0       | 0.2266  | 0.3199  | 0.3300  | 0.2718  | 0.2043  | 0.2601  | 0.3154  | 0.1561  | 0.2414  | 0.2042  |
| 2-6-0-0       | 1.1924  | 1.5767  | 1.4700  | 1.0978  | 0.9745  | 0.7014  | 0.9625  | 0.5624  | 1.3317  | 0.8809  |
| 2-7-0-0       | 0.1177  | 0.0874  | 0.0676  | 0.0922  | 0.0998  | 0.0617  | 0.0917  | 0.0634  | 0.0864  | 0.1084  |
| 2-8-0-0       | 0.4346  | 0.6515  | 0.6902  | 0.4386  | 0.3962  | 0.2717  | 0.4287  | 0.2479  | 0.3721  | 0.3999  |
| 2-9-0-0       | 0.7381  | 0.8056  | 1.1366  | 0.6320  | 0.7422  | 0.3956  | 0.7065  | 0.4159  | 0.6706  | 0.5210  |
| 3-4-0-0       | 0.0015  | 0.0037  | 0.0002  | 0.0026  | 0.0012  | 0.0020  | 0.0025  | 0.0011  | 0.0017  | 0.0009  |
| 3-4-0-1       | 0.1443  | 0.3236  | 0.3434  | 0.1762  | 0.1179  | 0.1149  | 0.1270  | 0.3180  | 0.1418  | 0.0863  |
| 3-4-1-0       | 0.0032  | 0.0042  | 0.0042  | 0.0026  | 0.0023  | 0.0018  | 0.0032  | 0.0023  | 0.0028  | 0.0022  |
| 3-4-1-1       | 0.1415  | 0.1624  | 0.1934  | 0.0002  | 0.1616  | 0.1011  | 0.1195  | 0.1106  | 0.1373  | 0.1250  |
| 3-5-0-1       | 0.1285  | 0.1136  | 0.1304  | 0.0952  | 0.1247  | 0.0798  | 0.1096  | 0.0689  | 0.1128  | 0.1282  |
| 3-5-1-0       | 0.0059  | 0.0153  | 0.0148  | 0.0077  | 0.0052  | 0.0035  | 0.0044  | 0.0018  | 0.0029  | 0.0017  |
| 3-5-2-1       | 0.0049  | 0.0112  | 0.0131  | 0.0161  | 0.0157  | 0.0210  | 0.0624  | 0.0934  | 0.0577  | 0.0146  |
| 3-6-0-0       | 0.0034  | 0.0035  | 0.0003  | 0.0027  | 0.0032  | 0.0034  | 0.0036  | 0.0047  | 0.0027  | 0.0025  |
| 3-6-0-1       | 0.0233  | 0.0002  | 0.0437  | 0.0001  | 0.0204  | 0.0252  | 0.3937  | 0.5615  | 0.1372  | 0.0183  |
| 3-6-1-0       | 0.0130  | 0.0250  | 0.0247  | 0.0001  | 0.0227  | 0.0254  | 0.2500  | 0.6413  | 0.0863  | 0.0136  |
| 3-7-1-0       | 0.0345  | 0.0601  | 0.0029  | 0.0703  | 0.0452  | 0.0794  | 0.5778  | 1.5493  | 0.2269  | 0.0494  |
| 4-3-0-0       | 0.0005  | 0.0015  | 0.0016  | 0.0005  | 0.0005  | 0.0008  | 0.0006  | 0.0007  | 0.0007  | 0.0002  |
| 4-4-0-0       | 0.0075  | 0.0128  | 0.0145  | 0.0070  | 0.0062  | 0.0052  | 0.0078  | 0.0069  | 0.0098  | 0.0054  |
| 4-4-0-1       | 0.2604  | 0.0003  | 0.4187  | 0.2575  | 0.2131  | 0.2829  | 0.2248  | 0.1944  | 0.2705  | 0.2155  |
| 4-4-1-0       | 0.0141  | 0.0007  | 0.0146  | 0.0065  | 0.0062  | 0.0062  | 0.0090  | 0.0023  | 0.0124  | 0.0100  |
| 4-4-2-1 Iso 1 | 0.0114  | 0.0012  | 0.0066  | 0.0080  | 0.0047  | 0.0035  | 0.0005  | 0.0000  | 0.0002  | 0.0082  |
| 4-4-2-1 Iso 2 | 0.0082  | 0.0032  | 0.0071  | 0.0059  | 0.0048  | 0.0026  | 0.0004  | 0.0000  | 0.0001  | 0.0047  |
| 4-4-3-0       | 0.1869  | 0.8033  | 0.1476  | 0.0135  | 0.0109  | 0.0278  | 0.1557  | 0.0494  | 0.0116  | 0.0778  |
| 4-5-0-0       | 0.0221  | 0.0255  | 0.0393  | 0.0232  | 0.0202  | 0.0155  | 0.0261  | 0.0317  | 0.0278  | 0.0178  |
| 4-5-0-1       | 3.3718  | 3.8479  | 0.0007  | 3.6967  | 3.9024  | 4.1832  | 3.8480  | 4.8491  | 4.4665  | 3.7000  |
| 4-5-0-2       | 50.2798 | 47.2169 | 46.2701 | 62.2760 | 53.1840 | 54.0171 | 46.3499 | 50.2571 | 47.2017 | 51.6217 |
| 4-5-1-0 Iso 1 | 0.0291  | 0.0430  | 0.0468  | 0.0238  | 0.0235  | 0.0212  | 0.0188  | 0.0257  | 0.0126  | 0.0126  |
| 4-5-1-0 Iso 2 | 0.1147  | 0.0944  | 0.0815  | 0.0534  | 0.0477  | 0.0519  | 0.0933  | 0.0858  | 0.0872  | 0.0929  |
| 4-5-1-1 Iso 1 | 0.5397  | 0.4686  | 0.4828  | 0.3749  | 0.2764  | 0.3030  | 0.4906  | 0.4752  | 0.3986  | 0.4185  |
| 4-5-1-1 Iso 2 | 0.3136  | 0.2364  | 0.1579  | 0.1476  | 0.1389  | 0.2547  | 0.1854  | 0.3265  | 0.1827  | 0.2707  |
| 4-5-1-2 Iso 1 | 5.5144  | 8.8990  | 7.9021  | 8.8621  | 4.6857  | 9.5074  | 9.1219  | 9.7620  | 10.5435 | 9.2318  |
| 4-5-1-2 Iso 2 | 1.5266  | 0.9533  | 1.0277  | 0.8906  | 0.7984  | 1.1490  | 1.2942  | 1.2422  | 0.9536  | 1.2344  |
| 4-5-3-2       | 0.4400  | 0.4145  | 0.4996  | 0.3165  | 0.2294  | 0.1680  | 0.0514  | 0.2018  | 0.0650  | 0.2662  |
| 4-6-2-0 Iso 1 | 0.0788  | 0.0810  | 0.0737  | 0.0669  | 0.0327  | 0.0271  | 0.0826  | 0.0637  | 0.0711  | 0.0474  |
| 4-6-2-0 Iso 2 | 0.0421  | 0.0213  | 0.0107  | 0.0139  | 0.0163  | 0.0269  | 0.0273  | 0.0439  | 0.0250  | 0.0516  |
| 4-6-1-0       | 0.3551  | 0.4742  | 0.6240  | 0.3630  | 0.3760  | 0.4806  | 0.5262  | 0.5262  | 0.5677  | 0.3376  |
| 4-6-0-1       | 0.0420  | 0.0008  | 0.0594  | 0.0656  | 0.0719  | 0.0610  | 0.0467  | 0.0463  | 0.0453  | 0.0558  |
| 4-6-0-2       | 0.1500  | 0.1391  | 0.1263  | 0.1916  | 0.1403  | 0.1841  | 0.3165  | 0.3503  | 0.3204  | 0.1740  |
| 4-6-1-1       | 4.2309  | 3.7644  | 3.5073  | 0.0012  | 4.0809  | 4.2424  | 3.5304  | 4.0240  | 3.9077  | 4.1201  |
| 4-6-2-1       | 0.5357  | 1.1539  | 1.0307  | 0.4190  | 0.9267  | 0.8076  | 1.0713  | 0.9247  | 1.0082  | 0.8091  |
| 5-3-0-0       | 0.0028  | 0.0001  | 0.0029  | 0.0004  | 0.0043  | 0.0020  | 0.0046  | 0.0008  | 0.0031  | 0.0040  |
| 5-3-1-0       | 0.0197  | 0.0181  | 0.0113  | 0.0002  | 0.0131  | 0.0101  | 0.0155  | 0.0145  | 0.0110  | 0.0177  |
| 5-4-0-1       | 0.0260  | 0.0010  | 0.0181  | 0.0108  | 0.0245  | 0.0180  | 0.0707  | 0.0636  | 0.0356  | 0.0194  |
| 5-4-1-0       | 0.0427  | 0.0394  | 0.0276  | 0.0011  | 0.0274  | 0.0174  | 0.0311  | 0.0219  | 0.0199  | 0.0466  |
| 5-4-1-1       | 0.0125  | 0.0127  | 0.0086  | 0.0085  | 0.0113  | 0.0084  | 0.0082  | 0.0072  | 0.0038  | 0.0128  |
| 5-5-0-0       | 0.0050  | 0.0043  | 0.0024  | 0.0031  | 0.0016  | 0.0022  | 0.0030  | 0.0017  | 0.0016  | 0.0042  |
| 5-5-0-1       | 0.1673  | 0.1779  | 0.3306  | 0.0828  | 0.0675  | 0.0488  | 0.0399  | 0.1236  | 0.0288  | 0.1057  |
| 5-5-0-2 Iso 1 | 0.0427  | 0.0720  | 0.1160  | 0.0023  | 0.0372  | 0.0577  | 0.0457  | 0.0188  | 0.0444  | 0.0222  |
| 5-5-0-2 Iso 2 | 0.0042  | 0.0197  | 0.0052  | 0.0026  | 0.0037  | 0.0057  | 0.0168  | 0.0071  | 0.0301  | 0.0126  |
| 5-5-1-0       | 0.0003  | 0.0016  | 0.0017  | 0.0005  | 0.0005  | 0.0007  | 0.0006  | 0.0007  | 0.0010  | 0.0001  |
| 5-5-1-1       | 0.1374  | 0.0981  | 0.0000  | 0.0768  | 0.0789  | 0.0620  | 0.0818  | 0.0736  | 0.0599  | 0.1355  |
| 5-5-1-2       | 0.1640  | 0.1358  | 0.0975  | 0.0964  | 0.1388  | 0.0983  | 0.1073  | 0.0524  | 0.0677  | 0.1427  |
| 5-6-0-1 Iso 1 | 0.0427  | 0.0930  | 0.1351  | 0.0066  | 0.0451  | 0.0448  | 0.0696  | 0.0760  | 0.1302  | 0.0538  |
| 5-6-0-1 Iso 2 | 0.1388  | 0.1861  | 0.1462  | 0.0115  | 0.1639  | 0.2564  | 0.1903  | 0.2533  | 0.2207  | 0.2777  |
| 5-6-0-3 Iso 1 | 2.5078  | 3.6486  | 3.5958  | 2.7171  | 3.9472  | 2.5614  | 3.3272  | 2.4468  | 3.1452  | 2.9371  |
| 5-6-0-3 Iso 2 | 8.2807  | 6.7659  | 11.4784 | 7.1825  | 8.9562  | 4.4662  | 9.3959  | 4.2800  | 8.6218  | 6.1886  |
| 5-6-0-3 Iso 3 | 1.5196  | 0.7287  | 1.5655  | 0.8978  | 0.9973  | 0.8445  | 1.3631  | 0.4350  | 1.2372  | 0.6294  |
| 5-6-0-3 Iso 4 | 0.2928  | 0.2232  | 0.1391  | 0.2991  | 0.1344  | 0.6568  | 0.6623  | 0.4009  | 0.1028  | 0.4457  |
| 5-6-0-4 Iso 1 | 0.0201  | 0.0193  | 0.0272  | 0.0182  | 0.0153  | 0.0673  | 0.0108  | 0.0080  | 0.0184  | 0.0248  |
| 5-6-0-4 Iso 2 | 0.0053  | 0.0048  | 0.0032  | 0.0061  | 0.0065  | 0.1538  | 0.0045  | 0.0047  | 0.0041  | 0.0059  |
| 5-6-1-1       | 0.1664  | 0.1470  | 0.1077  | 0.0803  | 0.0997  | 0.1241  | 0.1445  | 0.1338  | 0.1282  | 0.1507  |
| 5-6-1-2 Iso 1 | 0.0205  | 0.0685  | 0.0810  | 0.0316  | 0.0450  | 0.0346  | 0.0701  | 0.0836  | 0.1163  | 0.0437  |
| 5-6-1-2 Iso 2 | 0.2359  | 0.2985  | 0.1589  | 0.1039  | 0.2013  | 0.3520  | 0.2368  | 0.4179  | 0.3128  | 0.3973  |
| 5-6-1-2 Iso 3 | 0.1345  | 0.0924  | 0.0853  | 0.0780  | 0.0793  | 0.1404  | 0.1156  | 0.1198  | 0.1168  | 0.1276  |
| 5-6-1-2 Iso 4 | 0.0609  | 0.0320  | 0.0323  | 0.0372  | 0.0296  | 0.0357  | 0.0490  | 0.0451  | 0.0408  | 0.0439  |
| 5-6-1-3 Iso 1 | 0.0759  | 0.4207  | 0.4479  | 0.1342  | 0.2821  | 0.2239  | 0.3958  | 0.2719  | 0.4064  | 0.2012  |
| 5-6-1-3 Iso 2 | 4.9957  | 5.4075  | 3.6515  | 1.8385  | 4.5662  | 5.1856  | 4.7674  | 4.9081  | 5.1071  | 5.7311  |
| 5-6-1-3 Iso 3 | 0.1895  | 0.1000  | 0.0986  | 0.1077  | 0.1101  | 0.3701  | 0.3129  | 0.3369  | 0.1200  | 0.3108  |
| 5-6-2-3 Iso 1 | 0.1867  | 0.6085  | 0.2811  | 0.0763  | 0.2275  | 0.4507  | 0.4519  | 0.5524  | 0.5869  | 0.5611  |
| 5-6-2-3 Iso2  | 0.2717  | 0.1870  | 0.0717  | 0.0251  | 0.0272  | 0.2481  | 0.1220  | 0.1884  | 0.1578  | 0.2511  |
| 5-7-1-0       | 0.0015  | 0.0055  | 0.0058  | 0.0016  | 0.0014  | 0.0001  | 0.0022  | 0.0016  | 0.0051  | 0.0003  |
| 5-7-1-1       | 0.0602  | 0.1304  | 0.1495  | 0.1068  | 0.0962  | 0.0716  | 0.1189  | 0.0998  | 0.1334  | 0.0772  |
| 5-7-2-0       | 0.0117  | 0.0106  | 0.0086  | 0.0053  | 0.0078  | 0.0051  | 0.0124  | 0.0055  | 0.0077  | 0.0063  |
| 5-7-1-2 Iso 1 | 0.9502  | 0.8926  | 1.1367  | 0.7443  | 1.0363  | 0.5493  | 0.9882  | 0.4401  | 0.7328  | 0.6442  |
| 5-7-1-2 Iso2  | 0.0892  | 0.0571  | 0.0587  | 0.0637  | 0.0729  | 0.0856  | 0.0869  | 0.0507  | 0.0447  | 0.0704  |
| 6-4-1-1       | 0.1019  | 0.0817  | 0.1077  | 0.1450  | 0.1502  | 0.0775  | 0.1452  | 0.0605  | 0.1452  | 0.1000  |
| 6-5-1-0       | 0.0088  | 0.0218  | 0.0061  | 0.0010  | 0.0003  | 0.0006  | 0.0009  | 0.0008  | 0.0005  | 0.0021  |
| 6-6-0-2       | 0.1003  | 0.1243  | 0.2669  | 0.0575  | 0.0415  | 0.0267  | 0.0382  | 0.0733  | 0.0211  | 0.0541  |
| 6-6-1-2       | 0.0225  | 0.0302  | 0.0160  | 0.0023  | 0.0027  | 0.0080  | 0.0060  | 0.0246  | 0.0027  | 0.0177  |
| 6-6-1-3       | 0.0241  | 0.0201  | 0.0107  | 0.0116  | 0.0213  | 0.0142  | 0.0167  | 0.0086  | 0.0174  | 0.0156  |
| 6-7-0-1       | 0.0161  | 0.0442  | 0.0489  | 0.0417  | 0.0225  | 0.0246  | 0.0380  | 0.0381  | 0.0442  | 0.0389  |
| 6-7-0-2       | 0.1111  | 0.1557  | 0.1769  | 0.1605  | 0.1073  | 0.1365  | 0.2085  | 0.1276  | 0.1914  | 0.1828  |
| 6-7-0-3       | 0.3696  | 0.4248  | 0.5729  | 0.5100  | 0.3623  | 0.3329  | 0.7025  | 0.3207  | 0.4988  | 0.4166  |
| 6-7-0-4 Iso 1 | 0.0190  | 0.0256  | 0.0219  | 0.0278  | 0.0267  | 0.0376  | 0.0152  | 0.0212  | 0.0212  | 0.0207  |
| 6-7-0-4 Iso 2 | 0.0715  | 0.0539  | 0.0659  | 0.0713  | 0.0806  | 0.0542  | 0.1031  | 0.0376  | 0.0620  | 0.0598  |
| 6-7-0-4 Iso 3 | 0.0781  | 0.0311  | 0.0420  | 0.0465  | 0.0418  | 0.0324  | 0.0894  | 0.0252  | 0.0440  | 0.0430  |
| 6-7-1-1       | 0.0170  | 0.0119  | 0.0004  | 0.0094  | 0.0126  | 0.0109  | 0.0107  | 0.0157  | 0.0119  | 0.0174  |
| 6-7-1-2 Iso 1 | 0.0506  | 0.0592  | 0.0326  | 0.0317  | 0.0465  | 0.0706  | 0.0608  | 0.0761  | 0.0631  | 0.0781  |

## Supplementary Table S5. Continued...

| Glycan        | MCI 1  | MCI 2  | MCI 3  | MCI 4  | MCI 5  | MCI 6  | MCI 7  | MCI 8  | MCI 9  | MCI 10 |
|---------------|--------|--------|--------|--------|--------|--------|--------|--------|--------|--------|
| 6-7-1-2 Iso 2 | 0.0366 | 0.0208 | 0.0198 | 0.0210 | 0.0208 | 0.0227 | 0.0206 | 0.0278 | 0.0260 | 0.0281 |
| 6-7-1-2 Iso 3 | 0.0076 | 0.0044 | 0.0038 | 0.0045 | 0.0048 | 0.0056 | 0.0067 | 0.0065 | 0.0060 | 0.0057 |
| 6-7-1-3       | 0.2103 | 0.2627 | 0.1507 | 0.1120 | 0.1734 | 0.3004 | 0.2466 | 0.2875 | 0.2438 | 0.2856 |
| 6-7-1-4 Iso 1 | 0.0716 | 0.1168 | 0.0378 | 0.0377 | 0.0973 | 0.1645 | 0.1159 | 0.0907 | 0.0885 | 0.1351 |
| 6-7-1-4 Iso 2 | 0.2807 | 0.2799 | 0.1150 | 0.1309 | 0.3038 | 0.4081 | 0.3602 | 0.2640 | 0.2612 | 0.3485 |
| 6-7-1-4 Iso 3 | 0.3730 | 0.1960 | 0.0900 | 0.1282 | 0.2144 | 0.3185 | 0.3454 | 0.2468 | 0.2447 | 0.3384 |
| 6-7-2-4 Iso 1 | 0.0730 | 0.1077 | 0.0168 | 0.0172 | 0.0953 | 0.2163 | 0.0753 | 0.1031 | 0.0727 | 0.1920 |
| 6-7-2-4 Iso 2 | 0.1375 | 0.0990 | 0.0204 | 0.0209 | 0.0879 | 0.1999 | 0.0844 | 0.1145 | 0.0728 | 0.2034 |
| 6-7-3-4       | 0.0397 | 0.0352 | 0.0049 | 0.0054 | 0.0259 | 0.0843 | 0.0280 | 0.0453 | 0.0203 | 0.0793 |
| 6-7-1-0       | 0.0023 | 0.0063 | 0.0068 | 0.0060 | 0.0032 | 0.0050 | 0.0070 | 0.0051 | 0.0056 | 0.0055 |
| 6-8-1-1       | 0.0245 | 0.0210 | 0.0142 | 0.0050 | 0.0133 | 0.0143 | 0.0072 | 0.0223 | 0.0061 | 0.0138 |
| 7-8-0-4       | 0.0272 | 0.0230 | 0.0562 | 0.0221 | 0.0274 | 0.0196 | 0.0609 | 0.0204 | 0.0420 | 0.0287 |
| 7-8-1-3       | 0.0210 | 0.0185 | 0.0157 | 0.0131 | 0.0133 | 0.0289 | 0.0286 | 0.0292 | 0.0266 | 0.0245 |
| 7-8-1-4       | 0.0379 | 0.0265 | 0.0233 | 0.0186 | 0.0272 | 0.0341 | 0.0411 | 0.0348 | 0.0392 | 0.0318 |
| 7-8-2-4 Iso 1 | 0.0023 | 0.0021 | 0.0010 | 0.0004 | 0.0021 | 0.0033 | 0.0014 | 0.0029 | 0.0014 | 0.0024 |
| 7-8-2-4 Iso 2 | 0.0077 | 0.0090 | 0.0037 | 0.0019 | 0.0048 | 0.0099 | 0.0088 | 0.0089 | 0.0059 | 0.0080 |
| 8-6-0-0       | 3.6322 | 2.7986 | 4.8481 | 1.8808 | 2.8839 | 1.4835 | 1.4679 | 2.2826 | 1.3101 | 1.4193 |
| 8-6-0-1 Iso 1 | 0.5535 | 0.2892 | 0.8373 | 0.2294 | 0.3907 | 0.1806 | 0.1967 | 0.3780 | 0.2596 | 0.1745 |
| 8-6-0-1 Iso 2 | 0.7144 | 0.5615 | 0.8956 | 0.2485 | 0.6210 | 0.1662 | 0.3473 | 0.4422 | 0.3345 | 0.2375 |
| 8-6-0-1 Iso 3 | 0.4893 | 0.4471 | 0.2751 | 0.0820 | 0.3113 | 0.3238 | 0.1213 | 0.4754 | 0.1583 | 0.3087 |
| 8-6-0-1 Iso 4 | 0.0952 | 0.0608 | 0.0907 | 0.0432 | 0.0701 | 0.0420 | 0.0497 | 0.0601 | 0.0318 | 0.0398 |

**Supplementary Table S6.** MRM target list. GlcNAc, Hex, Fuc, NeuAc (*N*-acetylglucosamine, Hexose, Fucose, *N*-acetylneuraminic acid), and Iso = isomer.

| Glycan        | RT    | Precursor ion (m/z) | Target ions   |
|---------------|-------|---------------------|---------------|
| 4-5-1-1 Iso 1 | 37.92 | 1300.178            | 312,344,376   |
| 4-5-1-1 Iso 2 | 44.57 |                     |               |
| 4-5-1-1 Iso 3 | 47.62 |                     |               |
| 5-6-1-0       | 53.47 | 1344.204            | 196, 432, 464 |
| 5-6-0-1 Iso 1 | 51.54 | 958.834             | 344, 376, 825 |
| 5-6-0-1 Iso 2 | 53.88 |                     |               |
| 4-5-1-2 Iso 1 | 42.61 | 987.513             | 312, 344, 376 |
| 4-5-1-2 Iso 2 | 44.93 |                     |               |
| 4-5-1-2 Iso 3 | 48.57 |                     |               |
| 4-5-1-2 Iso 4 | 51.96 |                     |               |
| 4-5-1-2 Iso 5 | 55.01 |                     |               |
| 4-5-2-2       | 47.5  | 1045.542            | 312, 344, 376 |
| 5-6-0-2 Iso 1 | 44.49 | 1079.225            | 344, 376, 825 |
| 5-6-0-2 Iso 2 | 48.71 |                     |               |
| 5-6-0-2 Iso 3 | 52.22 |                     |               |
| 5-6-0-2 Iso 4 | 55.51 |                     |               |
| 5-6-0-2 Iso 5 | 58.67 |                     |               |
| 5-6-1-2 Iso 1 | 43.19 | 1137.255            | 312, 344, 376 |
| 5-6-1-2 Iso 2 | 46.47 |                     |               |
| 5-6-1-2 Iso 3 | 51.51 |                     |               |
| 5-6-1-2 Iso 4 | 53.51 |                     |               |
| 5-6-1-2 Iso 5 | 59.37 |                     |               |
| 5-6-1-2 Iso 6 | 62.63 | 1199.616            | 344, 376, 825 |
| 5-6-0-3 Iso 1 | 44.87 |                     |               |
| 5-6-0-3 Iso 2 | 48.62 |                     |               |
| 5-6-0-3 Iso 3 | 52.49 |                     |               |
| 5-6-0-3 Iso 4 | 56.35 |                     |               |
| 5-6-0-3 Iso 5 | 61.97 |                     |               |
| 6-7-1-2       | 58.14 | 965.500             | 312, 344, 376 |
| 5-6-2-3 Iso 1 | 46.12 | 1315.676            | 312, 344, 376 |
| 5-6-2-3 Iso 2 | 55.13 |                     |               |
| 6-7-1-3 Iso 1 | 41.78 | 1055.793            | 312, 344, 376 |
| 6-7-1-3 Iso 2 | 45.76 |                     |               |
| 6-7-1-3 Iso 3 | 49.28 |                     |               |
| 6-7-1-3 Iso 4 | 51.97 |                     |               |
| 6-7-1-3 Iso 5 | 54.19 |                     |               |
| 6-7-1-3 Iso 6 | 56.89 |                     |               |
| 6-7-0-4 Iso 1 | 44.95 | 1102.564            | 344, 376, 825 |
| 6-7-0-4 Iso 2 | 48.71 |                     |               |
| 6-7-0-4 Iso 3 | 52.45 |                     |               |
| 6-7-0-4 Iso 4 | 53.86 |                     |               |
| 6-7-0-4 Iso 5 | 57.26 |                     |               |
| 6-7-0-4 Iso 6 | 60.18 |                     |               |
| 6-7-0-4 Iso 7 | 61.82 |                     |               |
| 6-7-0-4 Iso 8 | 66.27 |                     |               |
| 6-7-0-4 Iso 9 | 70.59 |                     |               |

**Supplementary Table S7.** MGC MRM analysis, normalized abundance of targeted *N*-glycans digested from depleted low abundant serum glycoproteins of **control** patients. GlcNAc, Hex, Fuc, NeuAc (*N*-acetylglucosamine, Hexose, Fucose, *N*-acetylneuraminic acid), and Iso = isomer.

| Glycan        | Control 1 | Control 2 | Control 3 | Control 4 | Control 5 | Control 6 | Control 7 | Control 8 | Control 9 | Control 10 |
|---------------|-----------|-----------|-----------|-----------|-----------|-----------|-----------|-----------|-----------|------------|
| 4-5-1-1 Iso 1 | 0.1012    | 0.2559    | 0.3087    | 0.3154    | 0.1132    | 0.2743    | 0.2933    | 0.1986    | 0.2205    | 0.2469     |
| 4-5-1-1 Iso 2 | 0.0546    | 0.2068    | 0.1575    | 0.2368    | 0.1658    | 0.1910    | 0.2128    | 0.1899    | 0.1999    | 0.2078     |
| 4-5-1-1 Iso 3 | 0.4704    | 0.9392    | 1.6520    | 0.8519    | 0.7150    | 0.9632    | 1.1038    | 0.9046    | 0.8487    | 0.8172     |
| 5-6-1-0       | 0.0070    | 0.0472    | 0.0536    | 0.0361    | 0.0486    | 0.0568    | 0.0535    | 0.0368    | 0.0270    | 0.0405     |
| 5-6-0-1 Iso 1 | 0.1467    | 1.8924    | 0.7835    | 0.7235    | 0.8191    | 1.1142    | 0.7781    | 0.7814    | 0.7301    | 1.1668     |
| 5-6-0-1 Iso 2 | 0.1060    | 1.4532    | 1.0313    | 0.9032    | 0.9648    | 1.2978    | 1.1014    | 1.0380    | 0.9729    | 1.2070     |
| 4-5-1-2 Iso 1 | 2.7133    | 2.7858    | 9.8218    | 8.6038    | 2.2191    | 5.5597    | 5.9546    | 5.1991    | 6.2966    | 5.3548     |
| 4-5-1-2 Iso 2 | 2.8674    | 2.6647    | 5.5112    | 3.6981    | 2.9414    | 3.3327    | 3.1832    | 3.2381    | 3.8764    | 3.3370     |
| 4-5-1-2 Iso 3 | 4.8137    | 2.3143    | 2.4795    | 2.6981    | 2.8387    | 2.1815    | 2.3025    | 2.9260    | 3.2539    | 2.6922     |
| 4-5-1-2 Iso 4 | 17.5707   | 13.6086   | 13.1960   | 20.5655   | 16.3000   | 16.4110   | 28.7636   | 26.2329   | 22.1335   | 19.8769    |
| 4-5-1-2 Iso 5 | 1.5953    | 1.2655    | 1.1367    | 2.5937    | 1.0715    | 1.3783    | 2.9414    | 1.8149    | 1.4096    | 1.2908     |
| 4-5-2-2       | 0.8191    | 0.1500    | 0.3339    | 0.4156    | 0.1392    | 0.2446    | 0.4919    | 0.3704    | 0.3942    | 0.2502     |
| 5-6-0-2 Iso 1 | 1.6873    | 0.6001    | 0.5707    | 0.3477    | 0.6004    | 0.4174    | 0.3497    | 0.4324    | 0.7370    | 0.5566     |
| 5-6-0-2 Iso 2 | 7.1062    | 9.5315    | 5.1911    | 4.2640    | 7.0852    | 6.7021    | 2.3210    | 4.0797    | 5.2673    | 5.7399     |
| 5-6-0-2 Iso 3 | 3.2526    | 3.1761    | 2.9529    | 1.9739    | 2.3711    | 2.7649    | 1.8995    | 2.0173    | 2.9451    | 2.6432     |
| 5-6-0-2 Iso 4 | 4.4759    | 11.8154   | 5.6051    | 6.4465    | 8.9811    | 9.0047    | 6.6065    | 6.5065    | 5.0226    | 8.7173     |
| 5-6-0-2 Iso 5 | 1.3367    | 4.1057    | 2.7895    | 2.8315    | 3.2129    | 4.0338    | 4.0837    | 3.0432    | 2.2179    | 3.8742     |
| 5-6-1-2 Iso 1 | 0.1965    | 0.3605    | 0.3781    | 0.3476    | 0.1941    | 0.2892    | 0.3184    | 0.2890    | 0.3686    | 0.2941     |
| 5-6-1-2 Iso 2 | 2.7029    | 3.9202    | 5.6702    | 3.6548    | 1.5107    | 5.3920    | 5.5771    | 3.0675    | 3.1821    | 3.8253     |
| 5-6-1-2 Iso 3 | 1.1897    | 3.3293    | 3.1967    | 3.2759    | 1.2481    | 4.0147    | 4.7760    | 2.7837    | 2.1862    | 3.3232     |
| 5-6-1-2 Iso 4 | 0.5063    | 0.9795    | 0.4739    | 0.8342    | 0.7863    | 0.8751    | 0.9021    | 0.7414    | 0.9344    | 0.8616     |
| 5-6-1-2 Iso 5 | 0.1612    | 0.3648    | 0.2482    | 0.4283    | 0.3265    | 0.5046    | 0.5570    | 0.4276    | 0.3676    | 0.4698     |
| 5-6-1-2 Iso 6 | 0.2611    | 0.5919    | 0.2296    | 0.4486    | 0.4996    | 0.5711    | 0.7422    | 0.5176    | 0.4773    | 0.5476     |
| 5-6-0-3 Iso 1 | 1.9555    | 2.2543    | 3.6219    | 3.1065    | 3.9571    | 2.1838    | 2.4709    | 3.2204    | 4.1318    | 3.1933     |
| 5-6-0-3 Iso 2 | 11.9300   | 3.6319    | 4.7230    | 4.1131    | 5.2395    | 3.4326    | 2.5434    | 4.1236    | 6.5530    | 4.4971     |
| 5-6-0-3 Iso 3 | 15.6984   | 11.9570   | 11.3680   | 10.0354   | 12.7836   | 9.9909    | 4.2706    | 10.0491   | 12.7712   | 10.3266    |
| 5-6-0-3 Iso 4 | 0.8490    | 1.0674    | 1.2318    | 1.1191    | 1.4256    | 1.4718    | 0.9864    | 1.2209    | 1.2935    | 1.3113     |
| 5-6-0-3 Iso 5 | 3.4637    | 5.5356    | 5.3055    | 6.8892    | 8.7757    | 6.5291    | 7.9624    | 6.8982    | 4.3359    | 6.2586     |
| 6-7-1-2       | 0.0601    | 0.1808    | 0.1777    | 0.1124    | 0.0535    | 0.1994    | 0.2715    | 0.0998    | 0.0592    | 0.1134     |
| 5-6-2-3 Iso 1 | 1.0944    | 0.2242    | 0.5516    | 0.4024    | 0.2034    | 0.3215    | 0.4102    | 0.2816    | 0.3242    | 0.2889     |
| 5-6-2-3 Iso 2 | 0.5106    | 0.2692    | 0.3784    | 0.7468    | 0.2466    | 0.4793    | 0.9877    | 0.5639    | 0.4545    | 0.3264     |
| 6-7-1-3 Iso 1 | 0.2567    | 0.1240    | 0.1613    | 0.1586    | 0.1211    | 0.1058    | 0.1986    | 0.1696    | 0.2147    | 0.1382     |
| 6-7-1-3 Iso 2 | 0.7319    | 0.1566    | 0.1918    | 0.1290    | 0.1754    | 0.1117    | 0.1561    | 0.1610    | 0.2234    | 0.1487     |
| 6-7-1-3 Iso 3 | 0.4395    | 0.2963    | 0.3057    | 0.1778    | 0.1578    | 0.2612    | 0.1516    | 0.1817    | 0.1822    | 0.1445     |
| 6-7-1-3 Iso 4 | 0.2479    | 0.3369    | 0.3380    | 0.2250    | 0.2602    | 0.3167    | 0.2350    | 0.2351    | 0.2119    | 0.2293     |
| 6-7-1-3 Iso 5 | 0.6272    | 0.7792    | 1.0111    | 0.6287    | 0.4244    | 0.9897    | 0.6910    | 0.4627    | 0.3376    | 0.4973     |
| 6-7-1-3 Iso 6 | 0.1873    | 0.3940    | 0.4601    | 0.3190    | 0.2092    | 0.4560    | 0.3531    | 0.2262    | 0.1910    | 0.2811     |
| 6-7-0-4 Iso 1 | 0.1948    | 0.1112    | 0.1117    | 0.1338    | 0.0669    | 0.0583    | 0.0795    | 0.1592    | 0.1706    | 0.0776     |
| 6-7-0-4 Iso 2 | 1.5033    | 0.2729    | 0.3379    | 0.2243    | 0.3558    | 0.1756    | 0.1320    | 0.2554    | 0.3706    | 0.2353     |
| 6-7-0-4 Iso 3 | 2.3276    | 1.6942    | 1.4903    | 1.3210    | 2.6057    | 1.0614    | 0.4652    | 1.1296    | 1.4886    | 1.2719     |
| 6-7-0-4 Iso 4 | 1.6656    | 1.4123    | 1.9763    | 1.0778    | 2.4758    | 1.3065    | 0.4079    | 1.1687    | 0.9307    | 0.9124     |
| 6-7-0-4 Iso 5 | 0.1677    | 0.2299    | 0.1516    | 0.2372    | 0.3139    | 0.1650    | 0.1261    | 0.1977    | 0.2356    | 0.2047     |
| 6-7-0-4 Iso 6 | 0.9512    | 1.3780    | 1.0529    | 1.0381    | 2.7266    | 1.4092    | 0.5473    | 1.0189    | 0.5809    | 0.9577     |
| 6-7-0-4 Iso 7 | 0.6799    | 0.8874    | 0.8321    | 0.9132    | 1.3525    | 0.8559    | 0.7726    | 0.8066    | 0.5508    | 0.8532     |
| 6-7-0-4 Iso 8 | 0.1022    | 0.1353    | 0.2295    | 0.1215    | 0.2635    | 0.1467    | 0.0925    | 0.1812    | 0.1257    | 0.1071     |
| 6-7-0-4 Iso 9 | 0.2138    | 0.3124    | 0.2200    | 0.2752    | 0.6540    | 0.3971    | 0.3749    | 0.3523    | 0.1731    | 0.2847     |

**Supplementary Table S8.** MGC MRM analysis, normalized abundance of targeted *N*-glycans digested from depleted low abundant serum glycoproteins of **MCI** patients. GlcNAc, Hex, Fuc, NeuAc (*N*-acetylglucosamine, Hexose, Fucose, *N*-acetylneuraminic acid), and Iso = isomer.

| Glycan        | MCI 1   | MCI 2   | MCI 3   | MCI 4   | MCI 5   | MCI 6   | MCI 7   | MCI 8   | MCI 9   | MCI 10  |
|---------------|---------|---------|---------|---------|---------|---------|---------|---------|---------|---------|
| 4-5-1-1 Iso 1 | 0.1533  | 0.1613  | 0.0615  | 0.1226  | 0.0558  | 0.2407  | 0.0577  | 0.2139  | 0.1184  | 0.1975  |
| 4-5-1-1 Iso 2 | 0.1843  | 0.1534  | 0.1085  | 0.1730  | 0.1426  | 0.1468  | 0.0766  | 0.1439  | 0.1204  | 0.1854  |
| 4-5-1-1 Iso 3 | 0.4470  | 0.6760  | 0.4132  | 0.5440  | 0.4339  | 0.5773  | 0.3099  | 0.4927  | 0.5294  | 0.5966  |
| 5-6-1-0       | 0.0417  | 0.0336  | 0.0255  | 0.0263  | 0.0195  | 0.0280  | 0.0265  | 0.0229  | 0.0197  | 0.0329  |
| 5-6-0-1 Iso 1 | 1.3029  | 1.2355  | 0.8462  | 0.7902  | 0.6560  | 1.3090  | 0.5456  | 0.6989  | 0.6456  | 0.7315  |
| 5-6-0-1 Iso 2 | 0.7908  | 0.8962  | 0.5968  | 0.7389  | 0.8591  | 1.4605  | 0.5982  | 1.2922  | 0.8582  | 1.3562  |
| 4-5-1-2 Iso 1 | 4.5259  | 3.8026  | 1.0395  | 3.4047  | 1.2107  | 5.8390  | 2.2176  | 6.0728  | 3.2032  | 6.4081  |
| 4-5-1-2 Iso 2 | 3.7046  | 2.8189  | 2.1634  | 2.7373  | 2.8170  | 3.1978  | 2.7200  | 2.8413  | 2.9374  | 4.3421  |
| 4-5-1-2 Iso 3 | 2.4440  | 2.1372  | 1.9096  | 2.5396  | 2.2092  | 2.2873  | 2.1727  | 2.7402  | 2.9208  | 2.8342  |
| 4-5-1-2 Iso 4 | 6.1095  | 15.7739 | 9.8225  | 13.7854 | 9.6373  | 17.0254 | 12.3921 | 17.7690 | 19.3630 | 16.1405 |
| 4-5-1-2 Iso 5 | 0.4826  | 0.9606  | 0.6843  | 1.0950  | 0.3485  | 0.9669  | 1.0095  | 1.4497  | 1.3402  | 1.2903  |
| 4-5-2-2       | 0.1302  | 0.1907  | 0.0759  | 0.1728  | 0.1659  | 0.2714  | 0.1165  | 0.2641  | 0.1978  | 0.2994  |
| 5-6-0-2 Iso 1 | 1.1900  | 0.6355  | 0.8581  | 0.7627  | 0.8032  | 0.6228  | 0.4879  | 0.3770  | 0.4419  | 0.6072  |
| 5-6-0-2 Iso 2 | 9.8121  | 7.7603  | 9.6571  | 6.3202  | 8.2334  | 6.3602  | 6.6715  | 4.8419  | 6.2951  | 5.2539  |
| 5-6-0-2 Iso 3 | 3.8227  | 2.4566  | 2.3298  | 2.3326  | 3.2634  | 3.7293  | 2.4275  | 2.8497  | 2.1906  | 3.3416  |
| 5-6-0-2 Iso 4 | 9.2565  | 9.1565  | 9.7493  | 7.7686  | 9.7452  | 7.6926  | 6.8111  | 7.0739  | 6.7845  | 5.6123  |
| 5-6-0-2 Iso 5 | 2.3691  | 3.1977  | 2.2601  | 2.5180  | 3.2413  | 3.5949  | 2.1555  | 2.8586  | 2.0603  | 2.6172  |
| 5-6-1-2 Iso 1 | 0.1828  | 0.2375  | 0.1083  | 0.1078  | 0.0815  | 0.2535  | 0.0728  | 0.0927  | 0.1011  | 0.1430  |
| 5-6-1-2 Iso 2 | 3.6923  | 3.5949  | 1.0704  | 1.8380  | 1.0070  | 5.0998  | 1.4222  | 2.4137  | 1.5292  | 3.1744  |
| 5-6-1-2 Iso 3 | 2.4441  | 2.3991  | 0.7746  | 1.4483  | 0.9189  | 3.6894  | 1.0050  | 2.3165  | 1.2151  | 2.1849  |
| 5-6-1-2 Iso 4 | 0.5852  | 0.7499  | 0.6487  | 0.6233  | 0.5785  | 0.9242  | 0.6848  | 0.6802  | 0.7942  | 0.7815  |
| 5-6-1-2 Iso 5 | 0.3104  | 0.3229  | 0.1748  | 0.3050  | 0.2626  | 0.4638  | 0.2521  | 0.3465  | 0.3119  | 0.3796  |
| 5-6-1-2 Iso 6 | 0.3147  | 0.4308  | 0.4793  | 0.3809  | 0.3498  | 0.4007  | 0.3824  | 0.4460  | 0.5810  | 0.3611  |
| 5-6-0-3 Iso 1 | 3.5504  | 3.1653  | 2.2447  | 3.1496  | 2.7505  | 3.2395  | 2.7179  | 2.7126  | 2.3861  | 3.0792  |
| 5-6-0-3 Iso 2 | 7.2061  | 4.3569  | 5.5628  | 5.1448  | 6.9903  | 5.3900  | 6.8694  | 4.9107  | 4.6418  | 5.0388  |
| 5-6-0-3 Iso 3 | 17.8661 | 15.6229 | 26.9837 | 20.2701 | 23.8423 | 11.0626 | 24.5374 | 15.3635 | 20.4911 | 14.3311 |
| 5-6-0-3 Iso 4 | 1.3204  | 1.1750  | 1.1920  | 1.8060  | 1.8931  | 1.3782  | 1.5071  | 1.6373  | 1.0224  | 1.6113  |
| 5-6-0-3 Iso 5 | 4.6605  | 7.4592  | 8.1253  | 9.2615  | 7.9577  | 5.5689  | 7.6740  | 8.1606  | 7.5416  | 6.7725  |
| 6-7-1-2       | 0.0727  | 0.0673  | 0.0237  | 0.0603  | 0.0328  | 0.1355  | 0.0271  | 0.0799  | 0.0489  | 0.0951  |
| 5-6-2-3 Iso 1 | 0.3099  | 0.2828  | 0.1216  | 0.2437  | 0.2097  | 0.2715  | 0.1154  | 0.2862  | 0.1693  | 0.3952  |
| 5-6-2-3 Iso 2 | 0.1481  | 0.4228  | 0.2117  | 0.2927  | 0.1782  | 0.3704  | 0.2919  | 0.4705  | 0.4568  | 0.6878  |
| 6-7-1-3 Iso 1 | 0.1710  | 0.1152  | 0.1088  | 0.1455  | 0.1059  | 0.1660  | 0.1085  | 0.1223  | 0.1462  | 0.2150  |
| 6-7-1-3 Iso 2 | 0.3096  | 0.1790  | 0.1895  | 0.2465  | 0.2299  | 0.2284  | 0.1370  | 0.1431  | 0.1476  | 0.2757  |
| 6-7-1-3 Iso 3 | 0.3060  | 0.1745  | 0.1185  | 0.2036  | 0.2848  | 0.3068  | 0.1663  | 0.2346  | 0.2046  | 0.3170  |
| 6-7-1-3 Iso 4 | 0.4021  | 0.3133  | 0.2994  | 0.2066  | 0.2100  | 0.7287  | 0.3568  | 0.5613  | 0.3401  | 0.6760  |
| 6-7-1-3 Iso 5 | 0.6432  | 0.4787  | 0.2056  | 0.3493  | 0.1433  | 0.3914  | 0.1535  | 0.2869  | 0.1953  | 0.3653  |
| 6-7-1-3 Iso 6 | 0.4111  | 0.2694  | 0.1499  | 0.1841  | 0.1149  | 0.2131  | 0.1122  | 0.1854  | 0.1359  | 0.2108  |
| 6-7-0-4 Iso 1 | 0.1821  | 0.1655  | 0.1481  | 0.1863  | 0.1780  | 0.1116  | 0.0948  | 0.1065  | 0.1074  | 0.1377  |
| 6-7-0-4 Iso 2 | 0.5579  | 0.2968  | 0.4017  | 0.4136  | 0.5804  | 0.2794  | 0.4212  | 0.3102  | 0.3762  | 0.4433  |
| 6-7-0-4 Iso 3 | 2.3711  | 1.8278  | 2.7814  | 1.8217  | 2.2472  | 1.0225  | 2.4066  | 1.5630  | 2.1566  | 1.5187  |
| 6-7-0-4 Iso 4 | 2.4961  | 1.1029  | 1.9090  | 1.6779  | 1.7257  | 0.8557  | 2.9519  | 1.3818  | 1.7181  | 1.8053  |
| 6-7-0-4 Iso 5 | 0.1799  | 0.2574  | 0.3519  | 0.3762  | 0.3337  | 0.2268  | 0.3789  | 0.2959  | 0.3750  | 0.3030  |
| 6-7-0-4 Iso 6 | 1.2482  | 1.1107  | 1.4519  | 1.6482  | 1.4673  | 0.8689  | 2.4208  | 1.3244  | 1.3505  | 1.3208  |
| 6-7-0-4 Iso 7 | 0.8546  | 0.9127  | 1.0186  | 1.0958  | 0.9145  | 0.6198  | 1.1607  | 0.9951  | 0.9648  | 0.9706  |
| 6-7-0-4 Iso 8 | 0.2052  | 0.1612  | 0.2101  | 0.2049  | 0.1704  | 0.1143  | 0.2526  | 0.1797  | 0.1605  | 0.2060  |
| 6-7-0-4 Iso 9 | 0.2309  | 0.3012  | 0.3326  | 0.4760  | 0.3990  | 0.2690  | 0.5223  | 0.3901  | 0.3042  | 0.3523  |

**Supplementary Table S9.** List of glycoproteins observed in the proteomic analysis of the low abundant serum glycoproteins from depleted serum samples of control and MCI patients.

| No. | T: Protein IDs | Gene names | LFQ Intensity Average Control | LFQ Intensity Average MCI | Ratio Control/MCI | Fold change | p value |
|-----|----------------|------------|-------------------------------|---------------------------|-------------------|-------------|---------|
| 1   | O00391         | QSOX1      | 25.380                        | 25.184                    | 0.992             | -0.011      | 0.5524  |
| 2   | O75882         | ATRN       | 28.175                        | 28.315                    | 1.005             | 0.007       | 0.0788  |
| 3   | O95497         | VNN1       | 24.131                        | 23.383                    | 0.969             | -0.045      | 0.0475  |
| 4   | P00450         | CP         | 34.155                        | 34.316                    | 1.005             | 0.007       | 0.1077  |
| 5   | P00734         | F2         | 32.169                        | 32.235                    | 1.002             | 0.003       | 0.3615  |
| 6   | P00736         | C1R        | 30.324                        | 30.381                    | 1.002             | 0.003       | 0.3660  |
| 7   | P00740         | F9         | 27.743                        | 27.780                    | 1.001             | 0.002       | 0.3872  |
| 8   | P00742         | F10        | 27.246                        | 27.057                    | 0.993             | -0.010      | 0.4535  |
| 9   | P00747         | PLG        | 32.822                        | 32.892                    | 1.002             | 0.003       | 0.2732  |
| 10  | P00748         | F12        | 29.097                        | 29.287                    | 1.007             | 0.009       | 0.1203  |
| 11  | P00751         | CFB        | 33.094                        | 33.113                    | 1.001             | 0.001       | 0.4515  |
| 12  | P01008         | SERPINC1   | 31.351                        | 31.416                    | 1.002             | 0.003       | 0.2910  |
| 13  | P01011         | SERPINA3   | 32.701                        | 32.444                    | 0.992             | -0.011      | 0.1094  |
| 14  | P01019         | AGT        | 31.195                        | 31.343                    | 1.005             | 0.007       | 0.1620  |
| 15  | P01031         | C5         | 31.266                        | 31.225                    | 0.999             | -0.002      | 0.7224  |
| 16  | P01042         | KNB1       | 32.600                        | 32.676                    | 1.002             | 0.003       | 0.2077  |
| 17  | P02649         | APOE       | 29.896                        | 29.375                    | 0.983             | -0.025      | 0.0022  |
| 18  | P02671         | FGA        | 28.382                        | 28.339                    | 0.998             | -0.002      | 0.7563  |
| 19  | P02743         | APCS       | 30.800                        | 30.852                    | 1.002             | 0.002       | 0.7460  |
| 20  | P02745         | C1QA       | 27.600                        | 26.861                    | 0.973             | -0.039      | 0.0843  |
| 21  | P02748         | C9         | 30.942                        | 30.861                    | 0.997             | -0.004      | 0.9590  |
| 22  | P02749         | APOH       | 32.505                        | 32.739                    | 1.007             | 0.010       | 0.0414  |
| 23  | P02750         | LRG1       | 30.006                        | 30.020                    | 1.000             | 0.001       | 0.8199  |
| 24  | P02751         | FN1        | 32.869                        | 32.692                    | 0.995             | -0.008      | 0.3621  |
| 25  | P02760         | AMBIP      | 31.224                        | 31.229                    | 1.000             | 0.000       | 0.9246  |
| 26  | P02766         | TTR        | 27.098                        | 26.906                    | 0.993             | -0.010      | 0.9351  |
| 27  | P02790         | HPX        | 34.829                        | 35.035                    | 1.006             | 0.009       | 0.0293  |
| 28  | P03951         | F11        | 24.901                        | 24.674                    | 0.991             | -0.013      | 0.6699  |
| 29  | P03952         | KLKB1      | 29.114                        | 29.094                    | 0.999             | -0.001      | 0.5277  |
| 30  | P04003         | C4BPA      | 28.870                        | 27.979                    | 0.969             | -0.045      | 0.2105  |
| 31  | P04004         | VTN        | 31.363                        | 31.359                    | 1.000             | 0.000       | 0.6161  |
| 32  | P04070         | PROC       | 25.612                        | 25.489                    | 0.995             | -0.007      | 0.4458  |
| 33  | P04114         | APOB       | 33.446                        | 33.056                    | 0.988             | -0.017      | 0.0294  |
| 34  | P04180         | LCAT       | 23.308                        | 22.610                    | 0.970             | -0.044      | 0.1734  |
| 35  | P04196         | HRG        | 30.951                        | 31.219                    | 1.009             | 0.012       | 0.0483  |
| 36  | P04217         | A1BG       | 32.680                        | 32.804                    | 1.004             | 0.005       | 0.1506  |
| 37  | P04275         | VWF        | 28.019                        | 27.878                    | 0.995             | -0.007      | 0.7169  |
| 38  | P04278         | SHBG       | 26.351                        | 26.781                    | 1.016             | 0.023       | 0.1142  |
| 39  | P05090         | APOD       | 24.405                        | 24.033                    | 0.985             | -0.022      | 0.2599  |
| 40  | P05154         | SERPINA5   | 23.585                        | 23.904                    | 1.014             | 0.019       | 0.2592  |
| 41  | P05155         | SERPINC1   | 29.751                        | 29.612                    | 0.995             | -0.007      | 0.6020  |
| 42  | P05156         | CFIIF      | 30.170                        | 30.265                    | 1.003             | 0.005       | 0.6421  |
| 43  | P05160         | F13B       | 27.733                        | 28.013                    | 1.010             | 0.015       | 0.1438  |
| 44  | P05362         | ICAM1      | 22.679                        | 22.497                    | 0.992             | -0.012      | 0.3181  |
| 45  | P05543         | SERPINA7   | 28.528                        | 28.830                    | 1.011             | 0.015       | 0.0254  |
| 46  | P05546         | SERPIND1   | 30.211                        | 30.286                    | 1.002             | 0.004       | 0.3817  |
| 47  | P06276         | BCHE       | 27.388                        | 27.593                    | 1.007             | 0.011       | 0.1915  |
| 48  | P06681         | C2         | 29.159                        | 29.237                    | 1.003             | 0.004       | 0.6170  |
| 49  | P07225         | PROS1      | 27.550                        | 26.901                    | 0.976             | -0.034      | 0.0272  |
| 50  | P07357         | C8A        | 29.057                        | 29.047                    | 1.000             | 0.000       | 0.6972  |
| 51  | P07358         | C8B        | 29.163                        | 29.063                    | 0.997             | -0.005      | 0.9101  |
| 52  | P07359         | GP1BA      | 23.956                        | 23.556                    | 0.983             | -0.024      | 0.4152  |
| 53  | P08185         | SERPINA6   | 27.568                        | 27.504                    | 0.998             | -0.003      | 0.6108  |
| 54  | P08571         | CD14       | 25.965                        | 25.840                    | 0.995             | -0.007      | 0.9496  |
| 55  | P08603         | CFH        | 33.425                        | 33.333                    | 0.997             | -0.004      | 0.3842  |
| 56  | P08697         | SERPINF2   | 29.524                        | 29.594                    | 1.002             | 0.003       | 0.7635  |
| 57  | P09172         | DBH        | 24.531                        | 25.099                    | 1.023             | 0.033       | 0.3020  |
| 58  | P09486         | SPARC      | 24.855                        | 24.947                    | 1.004             | 0.005       | 0.4958  |
| 59  | P09871         | C1S        | 29.716                        | 29.745                    | 1.001             | 0.001       | 0.5469  |
| 60  | P0C0L4         | C4A        | 29.367                        | 28.506                    | 0.971             | -0.043      | 0.0094  |
| 61  | P0C0L5         | C4B        | 34.600                        | 34.332                    | 0.992             | -0.011      | 0.2134  |
| 62  | P10643         | C7         | 29.926                        | 30.050                    | 1.004             | 0.006       | 0.3704  |
| 63  | P10909         | CLU        | 30.811                        | 30.706                    | 0.997             | -0.005      | 0.8420  |
| 64  | P12259         | F5         | 26.876                        | 26.905                    | 1.001             | 0.002       | 0.6579  |
| 65  | P13591         | NCAM1      | 22.876                        | 23.087                    | 1.009             | 0.013       | 0.6527  |
| 66  | P13598         | ICAM2      | 23.221                        | 23.194                    | 0.999             | -0.002      | 0.9442  |
| 67  | P13671         | C6         | 30.177                        | 30.287                    | 1.004             | 0.005       | 0.3813  |
| 68  | P14151         | SELL       | 24.718                        | 24.906                    | 1.008             | 0.011       | 0.2074  |
| 69  | P17936         | IGFBP3     | 24.314                        | 25.403                    | 1.045             | 0.063       | 0.0011  |
| 70  | P18428         | LBP        | 24.968                        | 24.795                    | 0.993             | -0.010      | 0.7932  |
| 71  | P19320         | VCAM1      | 23.261                        | 23.050                    | 0.991             | -0.013      | 0.1231  |
| 72  | P19823         | ITIH2      | 32.611                        | 32.518                    | 0.997             | -0.004      | 0.8170  |
| 73  | P19827         | ITIH1      | 32.097                        | 32.014                    | 0.997             | -0.004      | 0.9061  |
| 74  | P20851         | C4BPB      | 23.855                        | 23.515                    | 0.986             | -0.021      | 0.7141  |
| 75  | P22792         | CPN2       | 28.761                        | 29.036                    | 1.010             | 0.014       | 0.0422  |
| 76  | P22891         | PROZ       | 25.036                        | 25.171                    | 1.005             | 0.008       | 0.2484  |
| 77  | P23142         | FBLN1      | 26.537                        | 27.200                    | 1.025             | 0.036       | 0.0697  |
| 78  | P25311         | AZGP1      | 32.135                        | 32.313                    | 1.006             | 0.008       | 0.1197  |
| 79  | P26927         | MST1       | 26.009                        | 26.324                    | 1.012             | 0.017       | 0.1745  |
| 80  | P27169         | PON1       | 24.299                        | 25.287                    | 1.041             | 0.058       | 0.0832  |
| 81  | P27918         | CFP        | 26.170                        | 25.706                    | 0.982             | -0.026      | 0.2548  |
| 82  | P29622         | SERPINA4   | 28.348                        | 28.683                    | 1.012             | 0.017       | 0.0378  |
| 83  | P35858         | IGFALS     | 28.701                        | 29.135                    | 1.015             | 0.022       | 0.0654  |
| 84  | P36955         | SERPINF1   | 30.220                        | 29.866                    | 0.988             | -0.017      | 0.2427  |
| 85  | P36980         | CFHR2      | 26.418                        | 26.950                    | 1.020             | 0.029       | 0.3546  |
| 86  | P43121         | MCAM       | 23.799                        | 24.321                    | 1.022             | 0.031       | 0.0246  |
| 87  | P43251         | BTB        | 26.179                        | 26.406                    | 1.009             | 0.012       | 0.1289  |
| 88  | P43652         | AFM        | 31.498                        | 31.474                    | 0.999             | -0.001      | 0.8577  |
| 89  | P48740         | MASP1      | 25.755                        | 25.882                    | 1.005             | 0.007       | 0.3931  |
| 90  | P49747         | COMP       | 26.447                        | 26.467                    | 1.001             | 0.001       | 0.5965  |
| 91  | P49908         | SELENOP    | 26.864                        | 26.763                    | 0.996             | -0.005      | 0.9790  |
| 92  | P51884         | LUM        | 29.560                        | 29.419                    | 0.995             | -0.007      | 0.7527  |
| 93  | P68871         | HBB        | 23.840                        | 23.347                    | 0.979             | -0.030      | 0.2814  |
| 94  | P80108         | GPLD1      | 24.885                        | 24.894                    | 1.000             | 0.001       | 0.6491  |
| 95  | P98160         | HSPG2      | 22.739                        | 22.701                    | 0.998             | -0.002      | 0.7015  |



## Supplementary Table S9. Continued...

| No. | T: Protein IDs | Gene names | LFQ Intensity Average Control | LFQ Intensity Average MCI | Ratio Control/MCI | Fold change | p value |
|-----|----------------|------------|-------------------------------|---------------------------|-------------------|-------------|---------|
| 96  | Q03591         | CFHR1      | 27.852                        | 27.759                    | 0.997             | -0.005      | 0.7823  |
| 97  | Q04756         | HGFAC      | 27.182                        | 27.151                    | 0.999             | -0.002      | 0.8986  |
| 98  | Q06033         | ITIH3      | 29.043                        | 28.685                    | 0.988             | -0.018      | 0.2828  |
| 99  | Q08380         | LGALS3BP   | 24.391                        | 24.021                    | 0.985             | -0.022      | 0.4550  |
| 100 | Q12805         | EFEMP1     | 24.561                        | 24.354                    | 0.992             | -0.012      | 0.9996  |
| 101 | Q14515         | SPARCL1    | 23.012                        | 22.769                    | 0.989             | -0.015      | 0.4595  |
| 102 | Q14520         | HABP2      | 27.415                        | 27.290                    | 0.995             | -0.007      | 0.7102  |
| 103 | Q14624         | ITIH4      | 32.505                        | 32.302                    | 0.994             | -0.009      | 0.1374  |
| 104 | Q16610         | ECM1       | 27.884                        | 27.921                    | 1.001             | 0.002       | 0.9531  |
| 105 | Q4G0P3         | HYDIN      | 27.993                        | 27.149                    | 0.970             | -0.044      | 0.8984  |
| 106 | Q6EMK4         | VASN       | 24.897                        | 24.481                    | 0.983             | -0.024      | 0.0402  |
| 107 | Q6UXB8         | PI16       | 24.975                        | 24.200                    | 0.969             | -0.046      | 0.1056  |
| 108 | Q86VB7         | CD163      | 23.537                        | 23.426                    | 0.995             | -0.007      | 0.4753  |
| 109 | Q8IUB2         | WFDC3      | 26.808                        | 26.739                    | 0.997             | -0.004      | 0.5431  |
| 110 | Q92820         | GGH        | 24.829                        | 24.813                    | 0.999             | -0.001      | 0.5991  |
| 111 | Q92954         | PRG4       | 24.795                        | 23.942                    | 0.966             | -0.050      | 0.0011  |
| 112 | Q961Y4         | CPB2       | 26.115                        | 26.394                    | 1.011             | 0.015       | 0.4123  |
| 113 | Q96KN2         | CNDP1      | 24.554                        | 25.993                    | 1.059             | 0.082       | 0.1296  |
| 114 | Q96PD5         | PGLYRP2    | 29.632                        | 29.811                    | 1.006             | 0.009       | 0.0925  |
| 115 | Q9BXR6         | CFHR5      | 23.680                        | 23.550                    | 0.995             | -0.008      | 0.9096  |
| 116 | Q9NZP8         | C1RL       | 25.460                        | 25.969                    | 1.020             | 0.029       | 0.1242  |
| 117 | Q9UGM5         | FETUB      | 25.159                        | 25.334                    | 1.007             | 0.010       | 0.5583  |
| 118 | Q9UK55         | SERPINA10  | 25.225                        | 25.582                    | 1.014             | 0.020       | 0.0829  |
| 119 | Q9UNN8         | PROCR      | 22.730                        | 22.815                    | 1.004             | 0.005       | 0.8216  |
| 120 | Q9Y6R7         | FCGBP      | 26.110                        | 25.783                    | 0.987             | -0.018      | 0.8940  |
